# Supplementary material for: Status and trends of mercury pollution of the atmosphere and terrestrial ecosystems in Poland
Source: PubMed Central journal article supplement (PMC8285459; doi:10.1007/s13280-021-01505-1), 2021-03-23
Supplement: 13280_2021_1505_MOESM1_ESM.pdf [file 13280_2021_1505_MOESM1_ESM.pdf]

*Ambio*

## **ELECTRONIC SUPPLEMENTARY MATERIAL**

*This supplementary material has not been peer reviewed.*

Title: **Status and trends of mercury pollution of the atmosphere and terrestrial ecosystems in Poland**

Authors: Agnieszka Jędruch, Lucyna Falkowska, Dominika Saniewska, Maciej Durkalec, Agnieszka Nawrocka, Elżbieta Kalisińska, Artur Kowalski, and Józef M. Pacyna (✉ [lucyna.falkowska@ug.edu.pl](mailto:lucyna.falkowska@ug.edu.pl), [lucynafalkowska@gmail.com](mailto:lucynafalkowska@gmail.com) )

## Extended Materials and Methods

### *Data collection*

As already stated in the article, the first results on Hg level, both in the case of terrestrial and freshwater ecosystems, date back to the 1970s. However, most of the results from that period are very difficult to access as the journals and reports publishing them have not been digitized. The uncertainty of the archival data is also related to the capabilities of analytical methods used in that time. The methods commonly used in the 1970s and 1980s detected Hg at part per million (ppm) level and, as shown in Sect. Hg level in abiotic environmental compartments and Sect. Hg level in terrestrial plants and animals of the paper, the Hg concentrations in the investigated elements of Polish environment are generally much lower.

As the toxicity and bioavailability of Hg are dependent on its speciation, to fully assess the risk to wildlife and humans, it is important to consider the form of Hg in the environment. Although methylmercury (MeHg) is one of the most poisonous among Hg compounds, this study focuses only on THg. This is because the knowledge of Hg speciation, both in abiotic and biotic environmental compartments in Poland, is mostly based on very highly limited data.

To determine the status and the temporal trends of THg pollution in Poland, a total of 85 data sources were used in this work, including 68 peer-reviewed journal articles, 3 books or book chapters, 6 reports, 6 legal acts, 1 thesis, and 1 open-access web material. These works were published between 1975 and 2020, with 84% of them after the year 2000 (**Fig. S1**). The discussion of data concerning Hg in the Polish ecosystem was based on additional 163 literature sources, including 151 peer-reviewed scientific papers, 5 books or book chapters, 3 conference proceeding articles, 3 reports, and 1 open-access web material published in years 1978-2020. As in the case of studies on Hg in Poland, the majority of works relating to Hg in other regions have been published in 2000 or later (**Fig. S1**). Due to the arrangement of the article, some of these references are provided here, in the Electronic Supplementary Material.

### *Data treatment*

In this paper, the THg concentrations were presented in the following units: ng per m<sup>3</sup> for air, ng per L for water, ng per g of dry weight (dw) for soil, plants and mushrooms, and ng per g of wet weight (ww) for animal tissues and organs. In case the source data were in a different format, adequate conversion factors were applied. The converted values are marked with a symbol (\*) and the calculation methods with references are given under each table.

Statistical analysis was carried out using the STATISTICA 12 (StatSoft). To model the relationship between variables analysed the linear regression was applied. This method was also used to determine the temporal changes of THg concentration, based on average values for each year. Considering the non-normal distribution of data and their limited number, to determine the significance of differences for data on Hg concentration obtained in the two periods, varying in Hg emission (before and after the year 2002 (**Fig. 1**, **Fig. S2**)), the nonparametric Mann-Whitney Test was used. The hypotheses were tested at a statistical significance level of  $p=0.05$ .

Figures presented in this study, including **Fig. 1**, **Fig. 3**, **Fig. 5**, **Fig. 6**, **Fig. 7**, **Fig. S1** and **Fig. S2**, were created using MS Excel and CorelDRAW X6. For the preparation of **Fig. 2** and **Fig. 4**, the ArcMap 10.4.1 (ESRI) was used, with the WGS 1984 coordination system and the UTM zone 34N for data projection. **Fig. 2** was prepared by the manual digitisation of the analogue map by Pasieczna (2012), with symbols as in the source. The **Fig. 4**, was created based on the spatial interpolation of point data using the inverse distance weighting (IDW) method (Bartier and Keller, 1996) and the geometrical intervals for symbol classification.

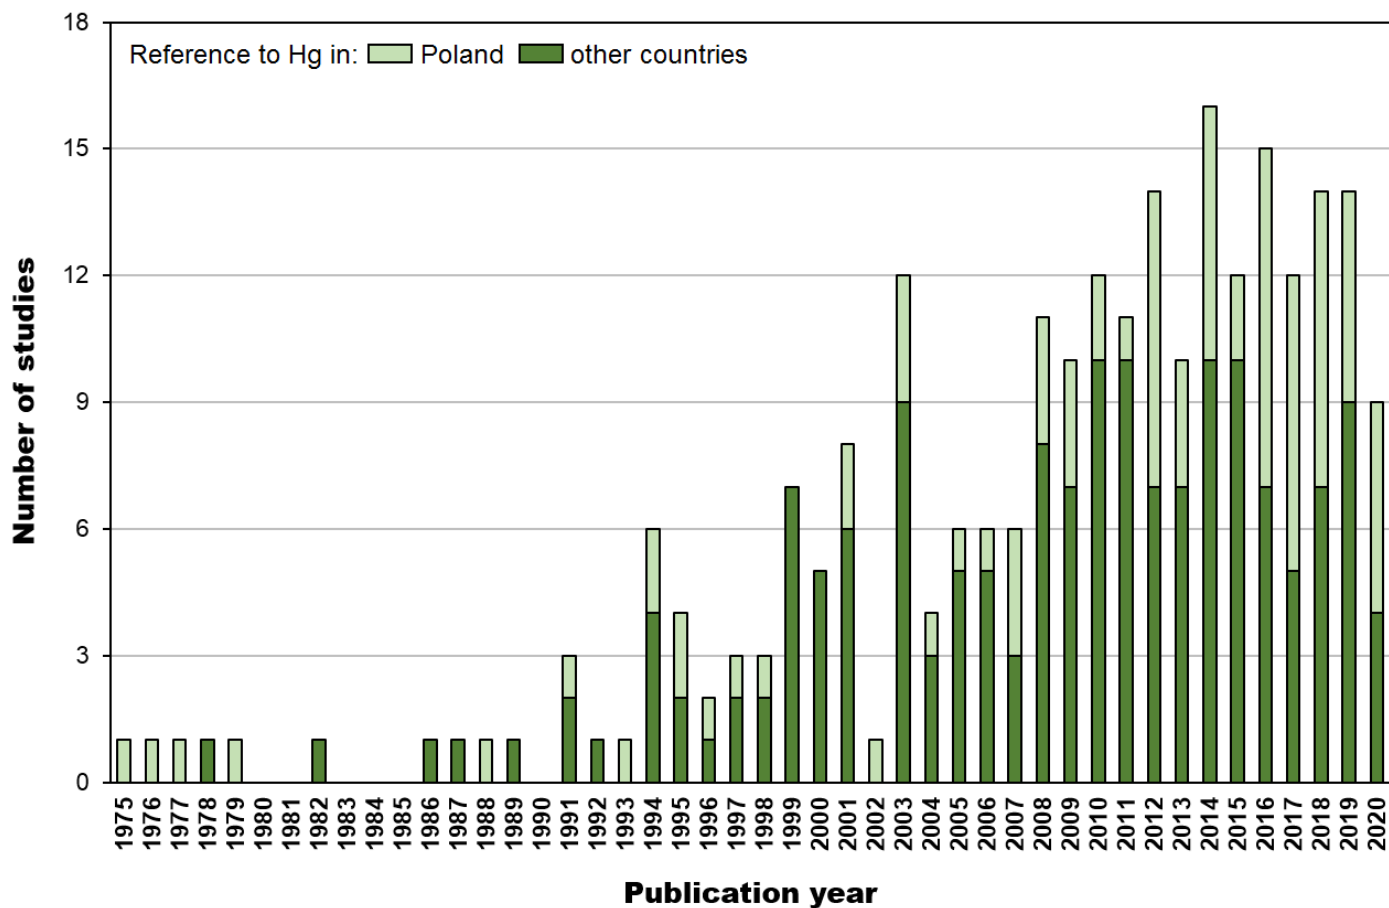

**Figure S1** Number and publication year of studies cited in this work. The total number of references in this article, including the supplementary material, is 248

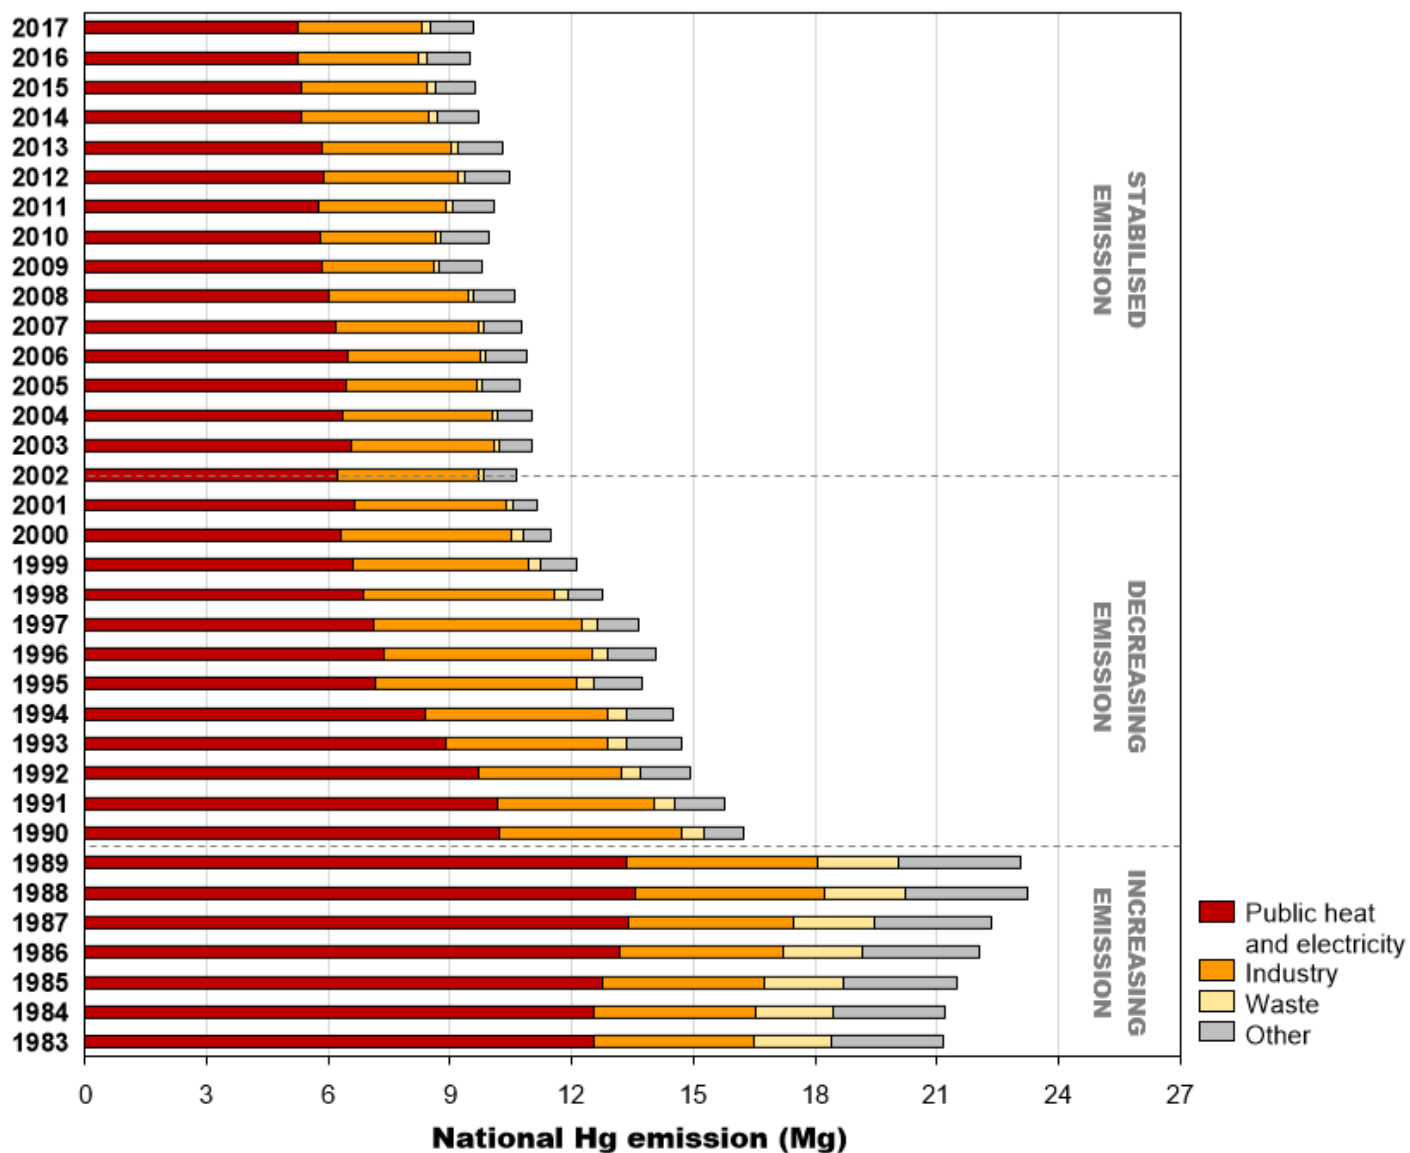

**Figure S2** Annual total Hg emission (Mg) from the territory of Poland in the years 1983-2017. Data for 1983-1989 were estimated based on the Hg emission from Eastern Europe and the former USSR published by Pirrone et al. (1996) with the accuracy from 94 to 107%. Data for 1990-2017 were published by the KOBiZE (2019)

**Table S1** Total Hg concentration (ng L<sup>-1</sup>) in unfiltered water of rivers and streams in Poland and other regions of the world

| Region             | Country        | Study area           | Period                 | Mean             | Range      | Reference                     |                         |                            |
|--------------------|----------------|----------------------|------------------------|------------------|------------|-------------------------------|-------------------------|----------------------------|
| <b>A)BASE FLOW</b> |                |                      |                        |                  |            |                               |                         |                            |
| Europe             | Spain          | Valdeazogues (P)     | 1995-1997              |                  | LOD-23300  | Berzas-Nevado et al., 2003    |                         |                            |
|                    |                | Jarama (U)           | 2002-2004              | 10               | 8.1-15     | Berzas-Nevado et al., 2008    |                         |                            |
|                    |                | Tagus (U)            | 2002-2004              | 8.3              | 4.0-12.1   | Berzas-Nevado et al., 2008    |                         |                            |
|                    | Russia         | Dvina                | 2011                   | 48               | 2-95       | Ovsepyan et al., 2016         |                         |                            |
|                    |                | <b>Poland</b>        | <b>Warta (P)</b>       | <b>2003-2004</b> | <b>40</b>  |                               | Kowalski et al., 2007   |                            |
|                    |                |                      | <b>Warta (U)</b>       | <b>2003-2004</b> | <b>27</b>  | <b>20-36</b>                  | Kowalski et al., 2007   |                            |
|                    |                |                      | <b>Warta (U)</b>       | <b>2003-2004</b> | <b>27</b>  | <b>20-36</b>                  | Kowalski et al., 2007   |                            |
|                    |                |                      | <b>Cybina (U)</b>      | <b>2003-2004</b> | <b>12</b>  |                               | Kowalski et al., 2007   |                            |
|                    |                |                      | <b>Odra</b>            | <b>2014</b>      | <b>12</b>  |                               | HELCOM, 2018 *          |                            |
|                    |                |                      | <b>Kacza</b>           | <b>2012-2013</b> | <b>6.7</b> | <b>0.7-10.6</b>               | Gębka et al., 2018      |                            |
|                    |                |                      |                        | <b>2008-2009</b> | <b>2.9</b> | <b>0.2-14.7</b>               | Saniewska et al., 2014b |                            |
|                    |                |                      | <b>Vistula</b>         | <b>2012</b>      | <b>7.4</b> |                               | Beldowska et al., 2016  |                            |
|                    |                |                      |                        | <b>2010</b>      | <b>7.3</b> | <b>4.7-11.7</b>               | Saniewska et al., 2014a |                            |
|                    |                |                      |                        | <b>2014</b>      | <b>6.7</b> |                               | HELCOM, 2018 *          |                            |
|                    |                |                      | <b>Gizdepka</b>        | <b>2012-2013</b> | <b>5.2</b> | <b>0.1-14.4</b>               | Gębka et al., 2018      |                            |
|                    |                |                      | <b>Zagórska Struga</b> | <b>2012-2013</b> | <b>4.9</b> | <b>1.2-19.8</b>               | Gębka et al., 2018      |                            |
|                    |                |                      | <b>Reda</b>            | <b>2012-2013</b> | <b>4.1</b> | <b>1.4-17.3</b>               | Gębka et al., 2018      |                            |
|                    |                |                      | <b>Płutnica</b>        | <b>2010</b>      | <b>4.1</b> | <b>1.0-16.0</b>               | Saniewska, 2013         |                            |
|                    |                |                      | <b>Oliwski Stream</b>  | <b>2008-2009</b> | <b>2.8</b> | <b>0.5-9.3</b>                | Saniewska et al., 2014b |                            |
|                    |                | Estonia              | Pärnu                  | 2014             | 11.1       |                               | HELCOM, 2018 *          |                            |
|                    |                | Finland              | Tornionjoki            | 2014             | 4.1        |                               | HELCOM, 2018 *          |                            |
|                    |                |                      | Kemijoki               | 2014             | 2.7        |                               | HELCOM, 2018 *          |                            |
|                    |                |                      | Kokemäenjoki           | 2014             | 2.6        |                               | HELCOM, 2018 *          |                            |
|                    |                |                      | Oulujoki               | 2014             | 1.7        |                               | HELCOM, 2018 *          |                            |
|                    |                |                      | Kymijoki               | 2014             | 1.7        |                               | HELCOM, 2018 *          |                            |
|                    |                | Lithuania            | Nemunas                | 2014             | 2.8        |                               | HELCOM, 2018 *          |                            |
|                    |                | Sweden               | various watercourses   | 2000-2010        |            | 0.5-4.5                       | Eklöf et al., 2012      |                            |
|                    |                |                      |                        | 2016             | 0.5        | 0.2-0.9                       | Bravo et al., 2018      |                            |
|                    |                |                      | Dalälven               | 2014             | 2.2        |                               | HELCOM, 2018 *          |                            |
|                    |                |                      | Ljusnan                | 2014             | 2.1        |                               | HELCOM, 2018 *          |                            |
|                    |                |                      | Ångermanälven          | 2014             | 1.6        |                               | HELCOM, 2018 *          |                            |
|                    |                |                      | Lule älv               | 2014             | 1.5        |                               | HELCOM, 2018 *          |                            |
|                    |                |                      | Göta älv               | 2014             | 1.4        |                               | HELCOM, 2018 *          |                            |
|                    | Kalix älv      |                      | 2014                   | 1.3              |            | HELCOM, 2018 *                |                         |                            |
|                    | Ume älv        |                      | 2014                   | 1.0              |            | HELCOM, 2018 *                |                         |                            |
|                    | Indalsälven    |                      | 2014                   | 0.8              |            | HELCOM, 2018 *                |                         |                            |
|                    | Latvia         |                      | Slocene                | 2005-2011        | 1.4        |                               | Bogans et al., 2011     |                            |
|                    |                |                      | Lielupe                | 2005-2011        | 0.4        |                               | Bogans et al., 2011     |                            |
|                    | UK             |                      | various watercourses   | 2016             | 1.5        | 0.3-2.8                       | Bravo et al., 2018      |                            |
|                    | Czech Republic | various watercourses | 2016                   | 0.8              |            | Bravo et al., 2018            |                         |                            |
|                    | France         | various watercourses | 2016                   | 0.7              | 0.5-0.9    | Bravo et al., 2018            |                         |                            |
|                    | Austria        | various watercourses | 2016                   | 0.6              | 0.1-1.0    | Bravo et al., 2018            |                         |                            |
|                    | Germany        | various watercourses | 2016                   | 0.4              | 0.3-0.6    | Bravo et al., 2018            |                         |                            |
|                    | Spain          | various watercourses | 2016                   | 0.4              | 0.1-0.9    | Bravo et al., 2018            |                         |                            |
|                    | Bulgaria       | various watercourses | 2016                   | 0.3              |            | Bravo et al., 2018            |                         |                            |
| North America      | USA            | San Carlos Creek (P) | 1997-1999              |                  | 640-12400  | Ganguli et al., 2000          |                         |                            |
|                    |                | Kuskokwim (P)        |                        |                  | 1 800-2500 | Gray et al., 2000             |                         |                            |
|                    |                | Hudson River (U)     | 2001                   | 62               | 28-116     | Heyes et al., 2004            |                         |                            |
|                    |                | Ohio                 | 2009                   |                  | 0.6-37     | Naik and Hammerschmidt, 2011  |                         |                            |
|                    |                | San Carlos Creek     | 1997-1999              |                  | 4.2-12     | Ganguli et al., 2000          |                         |                            |
|                    |                | Provo                | 2015-2017              | 3.1              | 0.3-8.2    | Packer et al., 2020           |                         |                            |
|                    |                | Herring Run (U)      | 1997                   | 2.4              |            | Lawson et al., 2001           |                         |                            |
|                    |                | Choptank             | 1997                   | 2.4              |            | Lawson et al., 2001           |                         |                            |
|                    |                | Potomac              | 1997                   | 2.4              |            | Lawson et al., 2001           |                         |                            |
|                    |                | Rappahannock         | 1997                   | 2.1              |            | Lawson et al., 2001           |                         |                            |
|                    |                | Susquehanna          | 1997                   | 1.4              |            | Lawson et al., 2001           |                         |                            |
|                    |                | Patapsco             | 1997                   | 1.4              |            | Lawson et al., 2001           |                         |                            |
|                    |                | Canada               | Yukon                  | 2001-2005        | 15         |                               | Schuster et al., 2011   |                            |
|                    |                | South America        | Brasil                 | Xingu (P)        | 2014       |                               | LOD-220                 | Gomes Ribeiro et al., 2017 |
|                    |                |                      |                        | Tapajós          | 2013       | 4.6                           | 0.7-23.8                | Lino et al., 2019          |
| Bolivia            | Coroico        |                      | 1995-1996              |                  | 2.9-9.6    | Maurice-Bourgoin et al., 1999 |                         |                            |
|                    | Zongo          |                      | 1995-1996              |                  | 7.2-8.2    | Maurice-Bourgoin et al., 1999 |                         |                            |
|                    | Beni           |                      | 1995-1996              |                  | 2.2-2.6    | Maurice-Bourgoin et al., 1999 |                         |                            |

**Table S1** Continued

| Region             | Country       | Study area                     | Period              | Mean                  | Range         | Reference               |                      |
|--------------------|---------------|--------------------------------|---------------------|-----------------------|---------------|-------------------------|----------------------|
| Asia               | China         | Xiaxihe (P)                    | 2000                |                       | 550-10580     | Horvat et al., 2003     |                      |
|                    |               | Wuli (U)                       | 2007                | 920                   | 210-2700      | Wang et al., 2009       |                      |
|                    |               | Meizixi (P)                    | 2002                | 586                   |               | Feng et al., 2003       |                      |
|                    |               | Lianshan (U)                   | 2007                | 260                   | 230-290       | Wang et al., 2009       |                      |
|                    |               | Xiaxihe                        | 2000                | 130                   | 20-310        | Horvat et al., 2003     |                      |
|                    |               | Yantgze                        | 2013                | 90                    | 50-160        | Wu, 2014                |                      |
|                    |               | Cishan (U)                     | 2007                | 84                    |               | Wang et al., 2009       |                      |
|                    |               | Dongjiang                      | 2009                | 19                    | 11-49         | Liu et al., 2012        |                      |
|                    |               | China, Nepal, India            | Koshi               | 2017-2019             | 5.8           | 0.6-33                  | Sun et al., 2020     |
|                    |               | Indonesia                      | Kahayan (P)         | 2004-2007             |               | 20-2260                 | Elvince et al., 2008 |
|                    | Rungan        |                                | 2004-2007           |                       | 16-117        | Elvince et al., 2008    |                      |
| <b>B)HIGH FLOW</b> |               |                                |                     |                       |               |                         |                      |
| Europe             | <b>Poland</b> | <b>Poland, Vistula (flood)</b> | <b>2010</b>         | <b>59</b>             | <b>21-299</b> | Saniewska et al., 2014a |                      |
| North America      | USA           | Potomac                        | 1997                | 18.6                  |               | Lawson et al., 2001     |                      |
|                    |               | Herring Run (U)                | 1997                | 12.6                  |               | Lawson et al., 2001     |                      |
|                    |               | Provo (snowmelt)               | 2015-2017           | 8.9                   | 3.7-19.4      | Packer et al., 2020     |                      |
|                    |               | Susquehanna                    | 1997                | 6.6                   |               | Lawson et al., 2001     |                      |
|                    |               | Patapsco                       | 1997                | 5.2                   |               | Lawson et al., 2001     |                      |
|                    |               | Rappahannock                   | 1997                | 5.0                   |               | Lawson et al., 2001     |                      |
|                    |               | Choptank                       | 1997                | 3.1                   |               | Lawson et al., 2001     |                      |
|                    |               | Asia                           | China, Nepal, India | Koshi River (monsoon) | 2017-2019     | 6.7                     | 0.7-27               |

P – polluted area, U – urban area

\* Values calculated on the basis of the annual Hg load and average river flow.

Data were obtained through national monitoring programmes and reported by Contracting Parties to HELCOM in the frame to the Sixth Baltic Sea Pollution Load Compilation project (PLC-6). In accordance to EU Water Frame Directive (EC, 2013), heavy metals can be reported as dissolved concentrations, i.e. the dissolved phase of a water sample obtained by filtration through a 0.45 µm filter or any equivalent pre-treatment (HELCOM, 2015).

**Table S2** Total Hg concentration (ng g<sup>-1</sup> dw) in terrestrial vegetation: **a)** moss, **b)** grass, and **c)** caps of edible mushroom from Poland and other regions of the world

|                                          | Region        | Study area                          | Period           | Mean        | Range             | Reference                          |
|------------------------------------------|---------------|-------------------------------------|------------------|-------------|-------------------|------------------------------------|
| <b>A) MOSS</b>                           |               |                                     |                  |             |                   |                                    |
| Mixed species                            | Europe        | Slovakia                            | 2000             | 180         | <840              | Harmens et al., 2008               |
|                                          |               | Lithuania                           | 2000             | 88          | 62-114            | Harmens et al., 2008               |
|                                          |               | France                              | 2000             | 70          | 42-98             | Harmens et al., 2008               |
|                                          |               | Italy                               | 2000             | 70          | <492              | Harmens et al., 2008               |
|                                          |               | <b>Poland, Holy Cross Mountains</b> | <b>2008</b>      | <b>55</b>   | <b>28-97</b>      | Migaszewski et al., 2010           |
|                                          |               | Norway                              | 2000             | 52          | 30-74             | Harmens et al., 2008               |
|                                          |               | Russia                              | 1995             | 50          | <132              | Harmens et al., 2008               |
|                                          |               | Latvia                              | 2000             | 50          | 29-71             | Harmens et al., 2008               |
|                                          |               | Austria                             | 2000             | 50          | 20-80             | Harmens et al., 2008               |
|                                          |               | Czech Republic                      | 2000             | 48          | 33-63             | Harmens et al., 2008               |
|                                          |               |                                     |                  | 44          | 22-150            | Suchara et al., 2011               |
|                                          |               | Finland                             | 2000             | 42          | 19-61             | Harmens et al., 2008               |
|                                          |               | Germany                             | 2000             | 41          | 19-63             | Harmens et al., 2008               |
|                                          |               | Iceland                             | 2000             | 39          | 18-60             | Harmens et al., 2008               |
|                                          |               | Ukraine                             | 2000             | 39          | 17-61             | Harmens et al., 2008               |
|                                          |               | Switzerland                         | 2000             | 32          | 21-43             | Harmens et al., 2008               |
|                                          |               | <b>Poland, Sudety Mountains</b>     | <b>2010</b>      | <b>18</b>   | <b>12-35</b>      | Kłos et al., 2012                  |
|                                          |               | <b>Poland, Baltic coast</b>         | <b>2012</b>      | <b>17</b>   | <b>11-23</b>      | Bełdowska et al., 2016             |
|                                          |               | Sweden                              | 2000             | 17          | 1-36              | Harmens et al., 2008               |
|                                          | North America | USA, Pennsylvania                   | 2000-2005        | 424         | 300-580           | Davis et al., 2007                 |
|                                          |               | Canada, Kejimikujik Park            | 1997             |             | 45-395            | Rencz et al., 2003                 |
|                                          |               | Greenland                           |                  | 108         | 59-196            | Riget et al., 2000                 |
|                                          |               | USA, Alaska                         | 2014-2016        | 58          | 52-64             | Olson et al., 2019                 |
|                                          |               |                                     | 2007             | 52          | 20-101            | Migaszewski et al., 2010           |
|                                          |               | Canada, Yukon                       | 2010             | 41          | 24-97             | Rempel, 2010                       |
|                                          | Asia          | China, Guizhou (P)                  | 2002             | 16212       | 980-95000         | Qiu et al., 2005                   |
|                                          |               | China, Mt. Gongga                   | 1990             | 90          | 85-95             | Wang et al., 2019                  |
|                                          |               | China, Tibetan Plateau              | 2010-2012        | 54          | 13-273            | Shao et al., 2017                  |
|                                          | Antarctica    | Victoria Land                       | 2002             | 180         | 27-570            | Bargagli et al., 2005              |
|                                          |               | Deception Island                    | 2011             | 43          | 27-56             | Mão de Ferro, et al., 2014         |
| <b>B) GRASS</b>                          |               |                                     |                  |             |                   |                                    |
| Mixed species                            | Europe        | Spain, Almaden (P)                  |                  |             | 740-28100         | Molina et al. 2006                 |
|                                          |               | Sweden                              | 1990-1994        | 66          | 36-98             | Xiao et al., 1998                  |
|                                          |               | <b>Poland, LGCD (P)</b>             |                  | <b>39</b>   | <b>4-69</b>       | Barej, et al., 2009                |
|                                          |               | <b>Poland, Karkonosze Mountains</b> |                  | <b>30</b>   | <b>19-53</b>      | Barej, et al., 2009                |
|                                          |               | Czech Republic                      |                  | 13          | 5-29              | Suchara et al., 2011               |
|                                          |               | <b>Poland, Baltic coast</b>         | <b>2012</b>      | <b>12</b>   | <b>10-16</b>      | Bełdowska et al., 2016             |
|                                          | North America | USA, Alaska                         | 2014-2016        | 9           | 8-10              | Olson et al., 2019                 |
|                                          | South America | Bolivia, ASGM (P)                   | 2009             | 6300        | 3000-10400        | Terán-Mita et al., 2013            |
|                                          |               | Brasil, Tapajós (P)                 |                  | 242         | 20-480            | Egler et al., 2006                 |
|                                          | Africa        | Ghana, Obuasi (P)                   | 1992-1993        | 2580        | 200-6200          | Amonoo-Neizer et al., 1996         |
| <b>C) MUSHROOMS</b>                      |               |                                     |                  |             |                   |                                    |
| King bolete<br>( <i>Boletus edulis</i> ) | Europe        | Slovenia, Idrja (P)                 | 2014-2016        | 69000       | 54200-83800       | Kavčič et al., 2019                |
|                                          |               | Slovakia (P)                        |                  | 16260       | 4940-35870        | Musilová et al., 2019              |
|                                          |               | <b>Poland, Holy Cross Mountains</b> | <b>2000</b>      | <b>7600</b> | <b>4000-14000</b> | Falandysz et al., 2007             |
|                                          |               | Slovenia                            |                  | 5790        | 4430-7150         | Kavčič et al., 2019                |
|                                          |               | Slovakia                            |                  | 4087        | 624-23390         | Musilová et al., 2019              |
|                                          |               | Czech Republic                      | 2001-2003        | 3295        | 2000-6100         | Nováčková et al., 2007             |
|                                          |               | Italy, Tuscany                      | 2008-2009        | 2800        | 1000-6100         | Giannaccini et al., 2012           |
|                                          |               | Italy, Emilia                       |                  | 2670        | 1020-4320         | Cocchi et al., 2006                |
|                                          |               | <b>Poland, NE</b>                   | <b>1996-2000</b> | <b>2530</b> | <b>200-8600</b>   | Falandysz et al., 2007             |
|                                          |               | <b>Poland, NW</b>                   | <b>2009</b>      | <b>2340</b> | <b>2120-2500</b>  | Mazurkiewicz and Podlasińska, 2014 |
|                                          |               | <b>Poland, Tatry Mountains</b>      | <b>2000</b>      | <b>2300</b> | <b>670-4300</b>   | Falandysz et al., 2007             |
|                                          |               | Croatia                             | 2013             | 2180        | 730-5710          | Širić et al., 2015                 |
|                                          |               | <b>Poland, Sudety Mountains</b>     | <b>2000</b>      | <b>2100</b> | <b>1300-3100</b>  | Falandysz et al., 2007             |
|                                          |               | Spain                               | 2005-2006        | 2000        | 800-3200          | Melgar et al., 2009                |
|                                          |               | Sweden                              | 1995             | 1200        | 58-5400           | Falandysz et al., 2001             |
|                                          | Asia          | China, Yunnan                       | 2011-2014        | 4500        | 1600-22000        | Falandysz et al., 2015             |
|                                          |               | China, Sichuan                      | 2000-2011        | 4000        | 1600-7500         | Zhang et al., 2010                 |

P – polluted area

**Table S3** Total Hg concentration (ng g<sup>-1</sup> ww) in terrestrial animals: **a)** freshwater fish, **b)** wild animals, and **c)** livestock from Poland and other regions of the world

|                                            | Region         | Study area                            | Period           | Muscle         |                       | Liver                    |                                   | Reference                    |                      |                       |
|--------------------------------------------|----------------|---------------------------------------|------------------|----------------|-----------------------|--------------------------|-----------------------------------|------------------------------|----------------------|-----------------------|
|                                            |                |                                       |                  | Mean           | Range                 | Mean                     | Range                             |                              |                      |                       |
| <b>A) FRESHWATER FISH</b>                  |                |                                       |                  |                |                       |                          |                                   |                              |                      |                       |
| Common bream<br>( <i>Abramis brama</i> )   |                |                                       |                  |                |                       |                          |                                   |                              |                      |                       |
| Europe                                     | Czech Republic | 2003                                  | 960              | 550-1230       | 1500                  | 630-2980                 | Marsálek et al., 2005             |                              |                      |                       |
|                                            |                |                                       | 298              | 108-597        |                       |                          | Dušek et al., 2005                |                              |                      |                       |
|                                            |                | 1991-1996                             | Finland          | 340            | 50-810                | Hattula et al., 1978     |                                   |                              |                      |                       |
|                                            |                |                                       |                  | 1972-1975      | 340                   | 50-810                   | Hattula et al., 1978              |                              |                      |                       |
|                                            |                | 2007-2013                             | France           | 194            | 171-246               | Nguetseng et al., 2015   |                                   |                              |                      |                       |
|                                            |                |                                       |                  | 2000-2008      | 128                   | 65-241                   | Noël et al., 2013                 |                              |                      |                       |
|                                            |                | 2009-2010                             | Slovenia         | 36             | 19-46                 | 35                       | 7-63                              | Gentès et al., 2013 *        |                      |                       |
|                                            |                |                                       |                  | 2006           | 160                   | 50-480                   | Mazej et al., 2010                |                              |                      |                       |
|                                            |                | 2007-2013                             | Netherlands      | 158            | 103-236               | Nguetseng et al., 2015   |                                   |                              |                      |                       |
|                                            |                | 2007-2013                             | Sweden           | 150            | 123-180               | Nguetseng et al., 2015   |                                   |                              |                      |                       |
|                                            |                | <b>Poland</b>                         | <b>2011-2013</b> | <b>87</b>      | <b>1-391</b>          | Szkoda et al., 2014      |                                   |                              |                      |                       |
|                                            |                | 2007-2013                             | UK               | 51             | 43-60                 | Nguetseng et al., 2015   |                                   |                              |                      |                       |
|                                            |                | 2007-2013                             | Germany          | 26             | 18-43                 | Nguetseng et al., 2015   |                                   |                              |                      |                       |
|                                            |                | 1989-1991                             |                  | 19             | 3-47                  | Scharenberg et al., 1994 |                                   |                              |                      |                       |
| 1999-2000                                  | Hungary        | 25                                    | 15-37            | 23             | 5-62                  | Farkas et al., 2003 *    |                                   |                              |                      |                       |
| Asia                                       | Russia         |                                       | 400              | 50-2600        | Koval et al., 1999    |                          |                                   |                              |                      |                       |
| Pike<br>( <i>Esox lucius</i> )             |                |                                       |                  |                |                       |                          |                                   |                              |                      |                       |
| Europe                                     | Finland        | 1972-1975                             | 1070             | 230-3690       |                       |                          | Hattula et al., 1978              |                              |                      |                       |
|                                            |                |                                       | 290              | 118-590        | Ahonen et al., 2018 * |                          |                                   |                              |                      |                       |
|                                            |                | 2009-2013                             | Sweden           | 560            | 160-2400              |                          |                                   | Åkerblom et al., 2012        |                      |                       |
|                                            |                |                                       |                  | 1974-1999      |                       | 350-1390                 | Lindström, 2001                   |                              |                      |                       |
|                                            |                | 2009-2010                             | France           | 544            | 353-736               |                          |                                   | Gentès et al., 2013 *        |                      |                       |
|                                            |                |                                       |                  | 2000-2008      | 162                   | 92-232                   | Noël et al., 2013                 |                              |                      |                       |
|                                            |                | 1995-1996                             | UK (P)           | 342            | 252-432               |                          |                                   | Yamaguchi et al., 2003       |                      |                       |
|                                            |                | 1993-1994                             | Germany          |                | 220-850               |                          | <450                              | Meinelt et al., 1997         |                      |                       |
|                                            |                | <b>Poland</b>                         | <b>2011-2013</b> | <b>229</b>     | <b>1-400</b>          | Szkoda et al., 2014      |                                   |                              |                      |                       |
|                                            |                | 2000                                  | Hungary          |                | 150-303               |                          |                                   | Fleit and Lakatos, 2003      |                      |                       |
|                                            |                | 2005                                  | Czech Republic   | 180            |                       |                          |                                   | Kensova et al., 2010         |                      |                       |
|                                            |                | North America                         | Canada           | 1978-2004      | 666                   | 70-4110                  |                                   |                              | Lavigne et al., 2010 |                       |
|                                            |                |                                       |                  | 2000           |                       | 628-1506                 |                                   |                              | Jewett et al., 2003  |                       |
|                                            |                |                                       |                  | 2004-2006      | USA, Royale Is.       | 122-299                  | 69-622                            | 87-392                       | 48-3074              | Drevnick et al., 2008 |
| Asia                                       | Iran           | 2011                                  | 24-48            | 21-84          |                       |                          | Zamani-Ahmadmahmoodi et al., 2014 |                              |                      |                       |
| Common roach<br>( <i>Rutilus rutilus</i> ) |                |                                       |                  |                |                       |                          |                                   |                              |                      |                       |
| Europe                                     | Czech Republic | 2003                                  | 810              | 580-1270       | 880                   | 390-1690                 | Marsálek et al., 2005             |                              |                      |                       |
|                                            |                |                                       | 278              | 89-445         |                       |                          | Dušek et al., 2005                |                              |                      |                       |
|                                            |                | 1991-1996                             | Finland          | 500            | 110-1130              | Hattula et al., 1978     |                                   |                              |                      |                       |
|                                            |                |                                       |                  | 2009-2013      | 100                   | 53-150                   | Ahonen et al., 2018 *             |                              |                      |                       |
|                                            |                | 2004                                  | Slovakia         | 310            | 200-380               | Andreji et al., 2005     |                                   |                              |                      |                       |
|                                            |                | 2008-2015                             | Germany          | 165            | 39-332                | Lepom and Wellmitz, 2017 |                                   |                              |                      |                       |
|                                            |                | 1993                                  |                  | 59             | 16-169                | Falter and Schöler, 1994 |                                   |                              |                      |                       |
|                                            |                | 1991-1993                             | Sweden           | 130            | 20-540                | Sonesten, 2001           |                                   |                              |                      |                       |
|                                            |                | 2000-2008                             | France           | 94             | 36-299                | Noël et al., 2013        |                                   |                              |                      |                       |
|                                            |                | 2009-2010                             |                  | 81             | 35-123                | 87                       | 10-597                            | Gentès et al., 2013 *        |                      |                       |
|                                            |                | 2006                                  | Slovenia         | 80             | 30-160                | Mazej et al., 2010       |                                   |                              |                      |                       |
|                                            |                | 1995-1996                             | UK (P)           | 76             | 42-101                | Yamaguchi et al., 2003   |                                   |                              |                      |                       |
|                                            |                | 1991-1994                             | UK               | 54             | 19-99                 | Edwards et al., 1999     |                                   |                              |                      |                       |
|                                            |                | <b>Poland</b>                         | <b>2014</b>      | <b>72</b>      | <b>58-102</b>         | <b>38</b>                | <b>20-52</b>                      | Łuczyńska et al., 2018       |                      |                       |
|                                            |                | Asia                                  | Russia           |                | 220                   | 50-700                   |                                   |                              | Koval et al., 1999   |                       |
|                                            |                | Iran                                  |                  | 45             | 22-65                 |                          |                                   | Zolfaghari, 2018 *           |                      |                       |
|                                            |                | <b>B) WILD ANIMALS</b>                |                  |                |                       |                          |                                   |                              |                      |                       |
|                                            |                | Red deer<br>( <i>Cervus elaphus</i> ) |                  |                |                       |                          |                                   |                              |                      |                       |
| Europe                                     | Croatia        | 2002-2005                             | 6                |                | 9                     |                          | Lazarus et al., 2008              |                              |                      |                       |
|                                            |                | 1990-2012                             | 3.7              |                | 7.4                   |                          | Lazarus et al., 2014              |                              |                      |                       |
|                                            |                | 2007-2008                             |                  | 0.6-1.1        |                       | 2.2-5.1                  | Srebočan et al., 2012             |                              |                      |                       |
|                                            |                | <b>Poland (P)</b>                     | <b>2009-2010</b> | <b>1.8-5.4</b> | <b>0.1-8.6</b>        | <b>6.7-17.2</b>          | <b>2.6-10.6</b>                   | <b>Albińska et al., 2011</b> |                      |                       |
|                                            |                | <b>Poland</b>                         | <b>2013-2014</b> | <b>1.0</b>     | <b>0.1-2.0</b>        | <b>7.0</b>               | <b>0.1-48.0</b>                   | <b>Giżewska et al., 2014</b> |                      |                       |
|                                            |                | 2004-2006                             | Spain            | 0.3            | 0.1-2.8               | 3.6                      | 0.1-16.9                          | Berzas Nevado et al., 2012   |                      |                       |
| Roe deer<br>( <i>Capreolus capreolus</i> ) |                |                                       |                  |                |                       |                          |                                   |                              |                      |                       |
| Europe                                     | Hungary        |                                       | 870              | 240-1460       |                       |                          | Lehel et al., 2015                |                              |                      |                       |
|                                            |                | 1991-1997                             | Slovenia (P)     | 79             | 28-143                | 849                      | 295-2270                          | Gnamuš et al., 2000          |                      |                       |



**Table S3** Continued

|                                     | Region        | Study area        | Period           | Muscle     |                | Liver      |                 | Reference                      |
|-------------------------------------|---------------|-------------------|------------------|------------|----------------|------------|-----------------|--------------------------------|
|                                     |               |                   |                  | Mean       | Range          | Mean       | Range           |                                |
|                                     |               | Slovakia          | 1991             |            |                | 27         | 2-132           | Findo et al., 1993             |
|                                     |               | Austria           | 1995             |            |                | 12         | 0-36            | Gufler et al., 1997            |
|                                     |               |                   | 2012-2013        | <4         |                |            |                 | Ertl et al., 2016              |
|                                     |               | <b>Poland (P)</b> | <b>2011-2013</b> | <b>3</b>   | <b>0.1-12</b>  | <b>9</b>   | <b>0.1-61</b>   | Durkalec et al., 2015          |
|                                     |               | Slovenia          | 1991-1997        | 2.8        | 2-5            | 14         | 10-17           | Gnamuš et al., 2000            |
|                                     |               | Croatia           | 1990-2012        | 1.5        |                | 9          |                 | Lazarus et al., 2014           |
|                                     |               | <b>Poland</b>     | <b>2011-2013</b> | <b>1</b>   | <b>0.1-9</b>   | <b>5.0</b> | <b>0.1-25.0</b> | Durkalec et al., 2015          |
|                                     |               | Serbia            | 2013-2014        | <1         |                |            |                 | Baloš et al., 2015             |
|                                     |               | Czech Republic    | 2005-2007        | 0.6        | 0.5-3.5        | 11         | 3-41            | Čelechovská et al., 2008       |
| Wild boar<br>( <i>Sus scrofa</i> )  | Europe        | Serbia            | 2004-2005        |            |                |            | 6-388           | Petrović, 2007                 |
|                                     |               | Slovakia          | 2009-2010        | 30         |                | 40         |                 | Gasparik et al., 2012          |
|                                     |               | Italy             | 1992             | 10         | 9-12           |            |                 | Barghigiani and Ristori, 1994  |
|                                     |               | Croatia           | 1990-2012        | 9          |                | 53         |                 | Lazarus et al., 2014           |
|                                     |               |                   | 2008-2009        | 4-12       | 1-61           |            |                 | Bilandžić et al., 2010b        |
|                                     |               |                   | 2008-2009        | 4-10       | 1-125          | 12-27      | 1-146           | Florijančić et al., 2015       |
|                                     |               | Austria           | 2012-2013        | 8          |                |            |                 | Ertl et al., 2016              |
|                                     |               | <b>Poland (P)</b> | <b>2011-2013</b> | <b>7</b>   | <b>0.1-23</b>  | <b>26</b>  | <b>6-84</b>     | Durkalec et al., 2015          |
|                                     |               | <b>Poland</b>     | <b>2011-2019</b> | <b>6</b>   | <b>0.1-20</b>  | <b>19</b>  | <b>3-28</b>     | Durkalec et al., 2015          |
|                                     |               | Spain (P)         | 2005             |            |                | 18         | <96             | Berzas Nevado et al., 2012     |
|                                     |               | Spain             | 2005             | 6          | 8-103          | 8          | 0.2-41          | Berzas Nevado et al., 2012     |
| Red fox<br>( <i>Vulpes vulpes</i> ) | Europe        | Spain             | 2004-2006        | 120        |                | 283        |                 | Millán et al., 2008            |
|                                     |               | Russia (P)        | 2007-2011        | 90         | 20-160         | 310        | 150-470         | Komov et al., 2016             |
|                                     |               | <b>Poland</b>     | <b>2004-2006</b> | <b>70</b>  | <b>20-240</b>  | <b>140</b> | <b>40-520</b>   | Kalisińska et al., 2012        |
|                                     |               | Russia            | 2015-2018        | 44         | 12-83          | 107        | 22-204          | Khabarova et al., 2018         |
|                                     |               | Croatia           | 2008-2009        | 29         | 4-82           | 89         | 11-288          | Bilandžić et al., 2010a        |
|                                     |               | Slovakia          | 1998-1999        | 13         | 1-32           | 220        | 1-450           | Piskorová et al., 2003         |
|                                     |               | Italy (P)         | 1992             |            |                | 160        | 20-300          | Corsolini et al., 1999         |
|                                     |               | Italy             | 1994-1995        |            |                | 30         | 0-620           | Alleva et al., 2006            |
|                                     | North America | Canada            | 1997-1998        | 220        |                | 410        |                 | Champoux et al., 1999          |
|                                     |               | USA, Alaska       | 2010-2011        | 157        | 27-556         | 341        | 32-1708         | Dainowski et al., 2015         |
|                                     |               | USA, Wisconsin    | 1972-1975        | 20         |                | 40         |                 | Sheffy and Amant, 1982         |
| <b>C) LIVESTOCK</b>                 |               |                   |                  |            |                |            |                 |                                |
| Cattle                              | Europe        | Czech Republic    | 2005-2007        | 21         |                | 24         |                 | Čelechovská et al., 2008       |
|                                     |               | Finland           | 1987-1988        | 12         |                | 11         |                 | Niemi et al., 1991             |
|                                     |               | Sweden            | 1984-1988        | 5          | 3-17           | 6          | 3-26            | Jorhem et al., 1991            |
|                                     |               | Slovakia          | 2011-2012        | 2.7        | 1.6-3.8        |            |                 | Lukáčová et al., 2014          |
|                                     |               | Netherlands       | 1980-1985        | 1          | 0-16           | 3          | 7-14            | Vos et al., 1987               |
|                                     |               | <b>Poland</b>     | <b>2009-2018</b> | <b>0.8</b> | <b>0.5-53</b>  | <b>1.8</b> | <b>0.5-51</b>   | Nawrocka et al., 2020          |
|                                     |               | Spain             | 1996-1997        | 0.5        | 0-19           | 1          | 0-94            | Alonso et al., 2003            |
|                                     | South America | Brazil            | 2011             | 12         | 0.3-40         |            |                 | Batista et al., 2012           |
|                                     | Asia          | Saudi Arabia      | 2011             | 16         | 9-24           |            |                 | Alturiqi and Albedair, 2012*   |
|                                     |               | Iran              |                  | 3          | 0-170          | 2          | 0-11            | Hashemi, 2018                  |
|                                     |               | Pakistan          |                  | 0.6        | 0.4-0.9        | 0.3        | 0.2-0.4         | Mariam et al., 2004            |
|                                     | Africa        | Ghana             | 2012             | 14         | 12-17          |            |                 | Nkansah and Anseh, 2014*       |
|                                     |               | Tanzania          | 2005             | 11-16      | 10-81          | 49-112     | 10-436          | Chibunda and Janssen, 2009     |
|                                     |               | Algeria           | 2012             | 11         | 9-14           |            |                 | Badis et al., 2014*            |
|                                     |               | Egypt             |                  | 4          | 3-5            | 6          | 5-7             | Khallafalla et al., 2011       |
| Pigs                                | Europe        | Finland           | 1987-1988        | 11         |                | 12         |                 | Niemi et al., 1991             |
|                                     |               | Sweden            | 1984-1988        | 9          | 3-30           | 15         | 6-54            | Jorhem et al., 1991            |
|                                     |               | Netherlands       | 1980-1985        | 2          | 1-20           | 2          | 1-29            | Vos et al., 1986               |
|                                     |               | Slovakia          | 2011-2012        | 1.3        | 0.8-1.8        |            |                 | Lukáčová et al., 2014          |
|                                     |               | Spain             | 2004             | 1          | 0.15-5         | 1          | 0.15-4          | López-Alonso et al., 2007      |
|                                     |               | <b>Poland</b>     | <b>2009-2018</b> | <b>0.7</b> | <b>0.5-36</b>  | <b>1.2</b> | <b>0.5-108</b>  | Nawrocka et al., 2020          |
|                                     |               | France            | 2014             |            | <LOD           |            | <LOD            | Parinet et al., 2018           |
|                                     | South America | Brazil            | 2011             | 23         | 0.5-130        |            |                 | Batista et al., 2012           |
| Chicken                             | Europe        | Turkey            |                  |            |                |            | 39-84           | Demibraş, 1999                 |
|                                     |               | <b>Poland</b>     | <b>2003</b>      | <b>3</b>   | <b>1-11</b>    | <b>4</b>   | <b>1-12</b>     | Opaliński et al., 2004         |
|                                     |               |                   | <b>2014-2015</b> | <b>0.7</b> | <b>0.1-1.8</b> | <b>2.5</b> | <b>0.4-16</b>   | Dobrzański et al., 2017        |
|                                     |               | Greece            |                  |            | 0.1-3.1        |            | 0.5-16.5        | Kambamanoli-Dimou et al., 1989 |
|                                     |               | Romania           |                  |            |                |            | <2.8            | Ghimpeteanu et al., 2012       |

**Table S3** Continued

| Region        | Study area   | Period    | Muscle  |         | Liver |       | Reference                     |
|---------------|--------------|-----------|---------|---------|-------|-------|-------------------------------|
|               |              |           | Mean    | Range   | Mean  | Range |                               |
| South America | Brazil       | 2011      | 8.4     | 0.5-30  |       |       | Batista et al., 2012          |
| Asia          | Saudi Arabia | 2011      | 3.2     | 2.3-3.8 |       |       | Alturiqi and Albedair, 2012 * |
|               | Pakistan     | 2008-2009 | 0.5     | 0.4-0.7 | 0.8   | 0.4-1 | Shah et al., 2010 *           |
|               | Indonesia    |           | 0.6     |         |       |       | Surtipanti et al., 1995       |
| Africa        | Algeria      | 2012      | 2.3-3.8 |         |       |       | Badis et al., 2014 *          |

P – polluted area

\* Values converted from dry weight

To convert the THg concentration in dry weight (dw) to wet weight (ww) the following conversion factors were applied: fish: 4.0 (Nogueira et al., 2013); cattle: 3.6 (Olsson et al., 2001); chicken: 3.9 (Mazzoni et al., 2015)

**Table S4** Total Hg concentration in muscles and livers of terrestrial animals with different feeding habits: **a)** freshwater fish, **b)** wild animals, and **c)** livestock (ng g<sup>-1</sup> ww) from Poland (data are also presented in the **Fig. 5**)

|                                            | Feeding habit | Period    | Muscle |           | Liver |           | Reference                                        |
|--------------------------------------------|---------------|-----------|--------|-----------|-------|-----------|--------------------------------------------------|
|                                            |               |           | Mean   | Range     | Mean  | Range     |                                                  |
| <b>A) FRESHWATER FISH</b>                  |               |           |        |           |       |           |                                                  |
| Common rudd ( <i>S. erythrophthalmus</i> ) | planktivorous | 2009-2014 | 92     | 66-109    |       |           | Kalisińska et al. 2017                           |
| Vendace ( <i>C. albula</i> )               | planktivorous | 2010      | 114    | 50-139    |       |           | Łuczyńska et al., 2016                           |
| European whitefish ( <i>C. lavaretus</i> ) | benthivorous  | 2010      | 65     | 54-81     |       |           | Łuczyńska et al., 2016                           |
| Common roach ( <i>R. rutilus</i> )         | benthivorous  | 2014      | 72     | 58-102    | 38    | 20-52     | Łuczyńska et al., 2018                           |
| Common bream ( <i>A. brama</i> )           | benthivorous  | 2011-2013 | 87     | <391      |       |           | Szkoda et al., 2014                              |
| White bream ( <i>B. bjoerca</i> )          | benthivorous  | 2009-2014 | 132    | 96-148    |       |           | Kalisińska et al. 2017                           |
| Crucian carp ( <i>C. carassius</i> )       | benthivorous  | 2000-2014 | 156    | 100-270   |       |           | Wyrzykowska et al., 2012; Kalisińska et al. 2017 |
| European eel                               | benthivorous  |           | 179    | 28-487    |       |           | Polak-Juszczak and Nermer, 2016                  |
| Tench ( <i>T. tinca</i> )                  | benthivorous  | 2000      | 340    | 220-520   |       |           | Wyrzykowska et al., 2012                         |
| Burbot ( <i>L. lota</i> )                  | piscivorous   | 2000      | 94     | 72-120    |       |           | Wyrzykowska et al., 2012                         |
| Pike-perch ( <i>S. lucioperca</i> )        | piscivorous   | 2011-2013 | 153    | <456      |       |           | Szkoda et al., 2014                              |
| Perch ( <i>P. fluviatilis</i> )            | piscivorous   | 2014      | 162    | 98-259    | 58    | 43-94     | Łuczyńska et al., 2018                           |
| Ide ( <i>L. idus</i> )                     | piscivorous   | 2009-2014 | 189    | 185-228   |       |           | Kalisińska et al. 2017                           |
| Pike ( <i>E. lucius</i> )                  | piscivorous   | 2011-2013 | 229    | <400      |       |           | Szkoda et al., 2014                              |
| <b>B) WILD ANIMALS</b>                     |               |           |        |           |       |           |                                                  |
| European rabbit ( <i>O. cuniculus</i> )    | herbivorous   | 1988-1989 | 1      | <5        | 2     | 1-3       | Żarski et al., 1995a                             |
| European bison ( <i>B. bonasus</i> )       | herbivorous   | 2012-2016 |        |           | 3     | 1-6       | Durkalec et al., 2018                            |
| Red deer ( <i>C. elaphus</i> )             | herbivorous   | 2013-2014 | 1      | <2        | 7     | <48       | Gizejewska et al. 2017                           |
| Roe deer ( <i>C. capreolus</i> )           | herbivorous   | 2011-2013 | 1      | <9        | 5     | <25       | Durkalec et al. 2015                             |
| European hare ( <i>L. europeaus</i> )      | herbivorous   | 1988-1989 | 8      | 3-13      | 22    | 1-43      | Żarski et al., 1995b                             |
| Eurasian beaver ( <i>C. fiber</i> )        | herbivorous   | 2011      | 11     | 10-11     | 24    | 18-42     | Gizejewska et al., 2014                          |
| Wild boar ( <i>S. scrofa</i> )             | omnivorous    | 2011-2013 | 6      | <20       | 19    | 3-28      | Durkalec et al. 2015                             |
| Red fox ( <i>V. vulpes</i> )               | omnivorous    | 2004-2006 | 70     | 20-240    | 140   | 40-520    | Kalisińska et al. 2012b                          |
| Raccoon ( <i>P. lotor</i> )                | omnivorous    | 2009-2014 | 152    | 3-730     |       |           | Kalisińska et al. 2017                           |
| Eurasian otter ( <i>L. lutra</i> )         | piscivorous   | 2009-2014 | 972    | 508-1601  |       |           | Kalisińska et al. 2017                           |
| American mink ( <i>N. vison</i> )          | piscivorous   | 2009-2011 | 2801   | 1781-4178 | 3650  | 1020-6470 | Kalisińska et al., 2012a                         |
| <b>C) LIVESTOCK</b>                        |               |           |        |           |       |           |                                                  |
| Rabbit                                     |               | 1987      | 1.0    | <2.0      | 3.0   | 1.0-4     | Falandysz, 1991                                  |
| Cattle                                     |               | 2009-2018 | 1.0    | 0.5-7     | 1.8   | 0.5-14    | Nawrocka et al., 2020                            |
| Sheep                                      |               | 2002-2006 | 1.9    | 1.0-14.5  | 3.1   | 1.0-15.8  | Zięba, 2003; Rudy, 2009                          |
| Pig                                        |               | 2009-2018 | 0.7    | 0.5-16.4  | 1.2   | 0.5-24.1  | Nawrocka et al., 2020                            |
| Chicken                                    |               | 2014-2015 | 0.7    | <1.8      | 2.5   | <16       | Dobrzański et al., 2017                          |
| Geese                                      |               | 1987      | 1.0    | <4.0      | 4.0   | 1.0-7.0   | Falandysz, 1991                                  |
| Duck                                       |               | 1987      | 3.1    | 1.0-7.0   | 10.0  | 5.0-17    | Falandysz, 1991                                  |
| Turkey                                     |               | 1987      | 6.0    | 3.0-9.0   | 8.0   | 5.0-10    | Falandysz, 1991                                  |

**Table S5** Temporal changes of total Hg concentration in muscles and livers of: **a)** wild animals, and **b)** livestock (ng g<sup>-1</sup> ww) from Poland (data are also presented in the **Fig. 6** and the **Fig. 7**)

|                       | Year | Muscle |       |     | Liver |       |     | Reference                                   |
|-----------------------|------|--------|-------|-----|-------|-------|-----|---------------------------------------------|
|                       |      | Mean   | Range | N   | Mean  | Range | N   |                                             |
| <b>A)WILD ANIMALS</b> |      |        |       |     |       |       |     |                                             |
| Wild boar             |      |        |       |     |       |       |     |                                             |
| <i>(Sus scrofa)</i>   |      |        |       |     |       |       |     |                                             |
|                       | 1988 | 5      | 1-23  | 118 | 18    | 5-42  | 57  | Falandysz, 1994                             |
|                       | 1989 | 3      | 1-9   | 116 | 13    | 7-23  | 10  | Falandysz, 1994                             |
|                       | 1990 | 2      | 1-5   | 119 | 8     | 5-12  | 12  | Falandysz, 1994                             |
|                       | 1991 | 2      | 1-6   | 69  |       |       |     | Falandysz, 1994                             |
|                       | 1998 | 7      | <32   | 186 |       |       |     | Szkoda and Żmudzki, 2001                    |
|                       | 1999 | 6      | <30   | 150 | 20    |       | 460 | Szkoda and Żmudzki, 2001                    |
|                       | 2000 | 7      | <39   | 124 | 17    | 4-25  | 45  | Szkoda and Żmudzki, 2001;<br>Sobańska, 2005 |
|                       | 2001 |        |       |     | 36    | 15-61 | 14  | Dobrowolska and Melosik, 2002               |
|                       | 2009 | 5      | 1-30  | 59  | 12    | 1-26  | 40  | Nawrocka et al., 2020                       |
|                       | 2010 | 8      | 3-15  | 13  | 20    | 14-32 | 12  | Nawrocka et al., 2020                       |
|                       | 2011 | 8      | 1-215 | 63  | 15    | 1-40  | 47  | Nawrocka et al., 2020                       |
|                       | 2012 | 4      | 1-9   | 27  | 17    | 1-37  | 26  | Nawrocka et al., 2020                       |
|                       | 2013 | 5      | 1-15  | 51  | 19    | 1-142 | 48  | Nawrocka et al., 2020                       |
|                       | 2014 | 7      | 1-26  | 59  | 14    | 1-42  | 53  | Nawrocka et al., 2020                       |
|                       | 2015 | 4      | 1-21  | 49  | 12    | 1-73  | 40  | Nawrocka et al., 2020                       |
|                       | 2016 | 4      | 1-23  | 70  | 18    | 3-76  | 50  | Nawrocka et al., 2020                       |
|                       | 2017 | 7      | 1-48  | 111 | 20    | 1-93  | 95  | Nawrocka et al., 2020                       |
|                       | 2018 | 5      | 1-29  | 98  | 16    | 1-83  | 65  | Nawrocka et al., 2020                       |
| Cervids               |      |        |       |     |       |       |     |                                             |
|                       | 1988 | 2      | <18   | 171 | 10    | 2-65  | 77  | Falandysz, 1994                             |
|                       | 1989 | 1      | <5    | 177 | 5     | 2-11  | 20  | Falandysz, 1994                             |
|                       | 1990 | 1      | <3    | 165 | 7     | 2-23  | 20  | Falandysz, 1994                             |
|                       | 1991 | 1      | <4    | 119 |       |       |     | Falandysz, 1994                             |
|                       | 1998 | 3      | <28   | 205 |       |       |     | Szkoda and Żmudzki, 2001                    |
|                       | 1999 | 3      | <32   | 222 | 7     |       | 616 | Szkoda and Żmudzki, 2001                    |
|                       | 2000 | 2      | <19   | 189 |       |       |     | Szkoda and Żmudzki, 2001                    |
|                       | 2001 |        |       |     | 6     |       | 6   | Dobrowolska and Melosik, 2002               |
|                       | 2009 | 1      | <5    | 56  | 8     | <32   | 37  | Nawrocka et al., 2020                       |
|                       | 2010 | 1      | 1-11  | 16  | 2     | 1-14  | 16  | Nawrocka et al., 2020                       |
|                       | 2011 | 1      | 1-3   | 20  | 3     | 1-16  | 20  | Nawrocka et al., 2020                       |
|                       | 2012 | 1      | 1-3   | 24  | 4     | 1-12  | 24  | Nawrocka et al., 2020                       |
|                       | 2013 | 1      | 1-11  | 31  | 2     | 1-10  | 26  | Nawrocka et al., 2020                       |
|                       | 2014 | 1      | 1-4   | 52  | 2     | 1-9   | 35  | Nawrocka et al., 2020                       |
|                       | 2015 | 1      | 1-28  | 55  | 4     | 1-41  | 41  | Nawrocka et al., 2020                       |
|                       | 2016 | 1      | 1-3   | 51  | 2     | 1-13  | 29  | Nawrocka et al., 2020                       |
|                       | 2017 | 1      | 1-3   | 60  | 2     | 1-20  | 65  | Nawrocka et al., 2020                       |
|                       | 2018 | 1      | 1-8   | 86  | 3     | 1-21  | 79  | Nawrocka et al., 2020                       |
| <b>B)LIVESTOCK</b>    |      |        |       |     |       |       |     |                                             |
| Cattle                |      |        |       |     |       |       |     |                                             |
|                       | 1988 | 2      | 1-5   | 58  | 5     | 2-15  | 58  | Falandysz, 1993                             |
|                       | 1989 | 1      | <2    | 53  | 4     | 1-10  | 53  | Falandysz, 1993                             |
|                       | 1990 | 1      | <3    | 44  | 5     | 1-66  | 44  | Falandysz, 1993                             |
|                       | 1991 | 1      | <5    | 44  | 4     | <21   | 44  | Falandysz, 1993                             |
|                       | 2009 | 2      | 1-7   | 4   | 1     |       | 1   | Nawrocka et al., 2020                       |
|                       | 2010 | 2      | 1-53  | 33  | 3     | 1-14  | 25  | Nawrocka et al., 2020                       |
|                       | 2011 | 1      | 1-9   | 49  | 3     | 1-23  | 29  | Nawrocka et al., 2020                       |
|                       | 2012 | 1      | 1-7   | 131 | 2     | 1-11  | 51  | Nawrocka et al., 2020                       |
|                       | 2013 | 1      | 1-7   | 83  | 2     | 1-12  | 37  | Nawrocka et al., 2020                       |
|                       | 2014 | 1      | 1-9   | 91  | 2     | 1-8   | 22  | Nawrocka et al., 2020                       |
|                       | 2015 | 1      | 1-4   | 59  | 1     | 1-5   | 50  | Nawrocka et al., 2020                       |
|                       | 2016 | 1      | 1-3   | 41  | 1     | 1-7   | 34  | Nawrocka et al., 2020                       |
|                       | 2017 | 1      | 1-10  | 155 | 1     | 1-11  | 215 | Nawrocka et al., 2020                       |
|                       | 2018 | 1      | <1    | 170 | 2     | 1-51  | 175 | Nawrocka et al., 2020                       |
| Pigs                  |      |        |       |     |       |       |     |                                             |
|                       | 1988 | 3      | <18   | 324 | 5     | 1-29  | 324 | Falandysz, 1993                             |
|                       | 1989 | 1      | <6    | 330 | 4     | 1-15  | 330 | Falandysz, 1993                             |
|                       | 1990 | 1      | <5    | 280 | 3     | <17   | 280 | Falandysz, 1993                             |
|                       | 1991 | 1      | <3    | 247 | 3     | 1-11  | 246 | Falandysz, 1993                             |
|                       | 2009 | 1      | 1-4   | 17  | 2     | 1-10  | 12  | Nawrocka et al., 2020                       |
|                       | 2010 | 1      | 1-15  | 35  | 2     | 1-8   | 27  | Nawrocka et al., 2020                       |
|                       | 2011 | 1      | 1-4   | 96  | 1     | 1-4   | 58  | Nawrocka et al., 2020                       |
|                       | 2012 | 1      | 1-7   | 242 | 1     | 1-24  | 78  | Nawrocka et al., 2020                       |

**Table S5** Continued

| Year | Muscle |       |     | Liver |       |     | Reference             |
|------|--------|-------|-----|-------|-------|-----|-----------------------|
|      | Mean   | Range | N   | Mean  | Range | N   |                       |
| 2013 | 1      | 1-36  | 183 | 1     | 1-10  | 46  | Nawrocka et al., 2020 |
| 2014 | 1      | 1-8   | 170 | 1     | 1-4   | 47  | Nawrocka et al., 2020 |
| 2015 | 1      | 1-3   | 123 | 1     | 1-6   | 87  | Nawrocka et al., 2020 |
| 2016 | 1      | <1    | 101 | 1     | 1-15  | 105 | Nawrocka et al., 2020 |
| 2017 | 1      | 1-4   | 240 | 1     | 1-108 | 341 | Nawrocka et al., 2020 |
| 2018 | 1      | 1-16  | 234 | 1     | 1-24  | 273 | Nawrocka et al., 2020 |

## REFERENCES

- Åkerblom, S., M. Nilsson, J. Yu, B. Ranneby, and K. Johansson. 2012. Temporal change estimation of mercury concentrations in northern pike (*Esox lucius* L.) in Swedish lakes. *Chemosphere* 86: 439-445. <https://doi.org/10.1016/j.chemosphere.2011.09.037>
- Ahonen, S.A., B. Hayden, J.J. Leppänen, and K.K. Kahilainen. 2018. Climate and productivity affect total mercury concentration and bioaccumulation rate of fish along a spatial gradient of subarctic lakes. *Science of The Total Environment* 637-638: 1586-1596. <https://doi.org/10.1016/j.scitotenv.2018.04.436>
- Albińska, J., J. Góralski, M.I. Szykowska, E. Leńiewska, and T. Paryczak. 2011. Mercury in carcasses of wild animals hunted in the province of Lodz. *Rocznik Ochrona Środowiska* 13: 525-538.
- Alleva, E., N. Francia, M. Pandolfi, A.M. De Marinis, F. Chiarotti, and D. Santucci. 2006. Organochlorine and Heavy-Metal Contaminants in Wild Mammals and Birds of Urbino-Pesaro Province, Italy: An Analytic Overview for Potential Bioindicators. *Archives of Environmental Contamination and Toxicology* 51: 123-134. <https://doi.org/10.1007/s00244-005-0218-1>
- Alturiqi, A.S., and L.A. Albedair. 2012. Evaluation of some heavy metals in certain fish, meat and meat products in Saudi Arabian markets. *Egyptian Journal of Aquatic Research* 38: 45-49. <https://doi.org/10.1016/j.ejar.2012.08.003>
- Amonoo-Neizer, E.H., D. Nyamah, and S.B. Bakiamoh. 1996. Mercury and arsenic pollution in soil and biological samples around the mining town of Obuasi, Ghana. *Water, Air, and Soil Pollution* 91: 363. <https://doi.org/10.1007/BF00666270>
- Andreji, J., I. Stránai, P. Massányi, and M. Valent. 2006. Accumulation of Some Metals in Muscles of Five Fish Species from Lower Nitra River. *Journal of Environmental Science and Health, Part A* 41: 2607-2622. <https://doi.org/10.1080/10934520600928003>
- Badis, B., Z. Rachid, and B. Esmā. 2014. Levels of Selected Heavy Metals in Fresh Meat from Cattle, Sheep, Chicken and Camel Produced in Algeria. *Annual Research and Review in Biology* 4: 1260-1267.
- Baloš, M.Ž., Ž. Mihaljev, S. Jakšić, N. Prica, G. Lazić, M. Kapetanov, and J.P. Radulović. 2015. The Incidence Of Heavy Metals And Other Toxic Elements In Roe Deer (*Capreolus capreolus*) Tissues. *Archivos de Medicina Veterinaria* 8: 3-10.
- Barej, R., R. Kwaśnicki, K. Chojnacka, J. Bolanowski, Z. Dobrzański, and P. Pokorný. 2009. Mercury Content in Rural and Industrial Regions in Lower Silesia. *Polish Journal of Environmental Studies* 18: 547-552.
- Bargagli, R., C. Agnorelli, F. Borghini, and F., Monaci. 2005. Enhanced Deposition and Bioaccumulation of Mercury in Antarctic Terrestrial Ecosystems Facing a Coastal Polynya. *Environmental Science and Technology* 39: 8150-8155. <https://doi.org/10.1021/es0507315>
- Barghigiani, C., and T. Ristori. 1994. Mercury Levels in Agricultural Products of Mt. Amiata (Tuscany, Italy). *Archives of Environmental Contamination and Toxicology* 26: 329-334. <https://doi.org/10.1007/BF00203559>
- Bartier, P.M., and C.P. Keller. 1996. Multivariate interpolation to incorporate thematic surface data using inverse distance weighting (IDW). *Computers and Geosciences* 22: 795-799. [https://doi.org/10.1016/0098-3004\(96\)00021-0](https://doi.org/10.1016/0098-3004(96)00021-0)
- Batista, B.L., D. Grotto, M.F.H. Carneiro, and F. Barbosa. 2012. Evaluation of the Concentration of Nonessential and Essential Elements in Chicken, Pork, and Beef Samples Produced in Brazil. *Journal of Toxicology and Environmental Health, Part A* 75: 1269-1279. <https://doi.org/10.1080/15287394.2012.709439>
- Beldowska, M., A. Jędruch, L. Łęczyński, D. Saniewska, and U. Kwasigroch. 2016. Coastal erosion as a source of mercury into the marine environment along the Polish Baltic shore. *Environmental Science and Pollution Research* 23: 16375-16382. <https://doi.org/10.1007/s11356-016-6753-7>
- Berzas Nevado, J.J., L.F. Garcia Bermejo, and R.C. Rodríguez Martín-Doimeadios. 2003. Distribution of mercury in the aquatic environment at Almaden, Spain. *Environmental Pollution* 122: 261-271. [https://doi.org/10.1016/S0269-7491\(02\)00290-7](https://doi.org/10.1016/S0269-7491(02)00290-7)
- Berzas Nevado, J.J., R.C. Rodríguez Martín-Doimeadios, F.J. Guzman Bernardo, M. Jimenez Moreno, S. Ortega Tardío, M.M. Sanchez-Herrera Fornieles, S. Martin-Nieto Ríos, and A. Doncel Perez. 2009. Integrated pollution evaluation of the Tagus River in Central Spain. *Environmental Monitoring and Assessment* 156: 461-477. <https://doi.org/10.1007/s10661-008-0498-9>
- Berzas Nevado, J.J., R.C. Rodríguez Martín-Doimeadios, R. Mateo, N. Rodríguez Fariñas, J. Rodríguez-Estival, and M.J. Patiño Roper. 2012. Mercury exposure and mechanism of response in large game using the Almadén mercury mining area (Spain) as a case study. *Environmental Research* 112: 58-66. <https://doi.org/10.1016/j.envres.2011.09.019>
- Bilandžić, N., D. Dezdek, M. Sedak, M. Dokic, B. Solomun, I. Varenina, Z. Knezevic, and A. Slavica. 2010a. Concentrations of trace elements in tissues of red fox (*Vulpes vulpes*) and stone marten (*Martes foina*) from suburban and rural areas in Croatia. *Bulletin of Environmental Contamination and Toxicology* 85: 486-491. <https://doi.org/10.1007/s00128-010-0146-2>
- Bilandžić, N., M. Sedak, M. Đokić, and B. Šimić. 2010b. Wild Boar Tissue Levels of Cadmium, Lead and Mercury in Seven Regions of Continental Croatia. *Bulletin of Environmental Contamination and Toxicology* 84: 738-743. <https://doi.org/10.1007/s00128-010-9999-7>
- Bogans, E., Z. Gavare, A. Svagere, R. Poikane, and J. Skudra. 2011. Mercury Pollution Exploration in Latvia with High-Sensitivity Zeeman Atomic Absorption Spectrometry. *Environmental and Climate Technologies* 7: 39-45. <https://doi.org/10.2478/v10145-011-0026-y>
- Bravo, A.G., D.N. Kothawala, K. Attermeyer, E. Tessier, P. Bodmar, J.L.J. Lefesma, J. Audet, J.P. Casas-Ruiz, et al. 2018. The interplay between total mercury, methylmercury and dissolved organic matter in fluvial systems: A latitudinal study across Europe. *Water Research* 144: 172-182. <https://doi.org/10.1016/j.watres.2018.06.064>
- Čelechovská, O., L. Malota, and S. Zima. 2008. Entry of Heavy Metals into Food Chains: a 20-year Comparison Study in Northern Moravia (Czech Republic). *Acta Veterinaria Brno* 77: 645-652. <https://doi.org/10.2754/avb200877040645>
- Champoux, L., J. Rodrigue, B. Braune, and D. Leclair. 1999. Contaminants in Northern Québec wildlife. In *Synopsis of research*

- conducted under the 1997-1998 Northern Contaminants Program, ed. J. Jensen, 109-116. Ottawa: Department of Indian Affairs and Northern Development.
- Chibunda, R.T., and C.R. Janssen. 2009. Mercury residues in free-grazing cattle and domestic fowl from the artisanal gold mining area of Geita district, Tanzania. *Food Additives and Contaminants, Part A* 26: 1482-1487. <https://doi.org/10.1080/02652030903114928>
- Corsolini, S., S. Focardi, C. Leonzio, S. Lovari, F. Monaci, and G. Romeo. 1999. Heavy metals and chlorinated hydrocarbon concentrations in the red fox in relation to some biological parameters. *Environmental Monitoring and Assessment* 54: 87-100. <https://doi.org/10.1023/A:1005974014029>
- Dainowski, B.H., L.K. Duffy, J. McIntyre, and P. Jones. 2015. Hair and bone as predictors of tissular mercury concentration in the Western Alaska Red Fox, *Vulpes vulpes*. *Science of The Total Environment* 518-519: 526-533. <https://doi.org/10.1016/j.scitotenv.2015.03.013>
- Davis, D.D., J.R. McClenahan, and R.J. Hutnik. 2007. Use of the Moss *Dicranum montanum* to Evaluate Recent Temporal Trends of Mercury Accumulation in Oak Forests of Pennsylvania. *Northeastern Naturalist* 14: 27-34. [https://doi.org/10.1656/1092-6194\(2007\)14\[27:uotmdm\]2.0.co;2](https://doi.org/10.1656/1092-6194(2007)14[27:uotmdm]2.0.co;2)
- Demibras, A. 1999. Proximate and heavy metal composition in chicken meat and tissues. *Food Chemistry* 67: 27-31.
- Dobrowolska, A., and M. Melosik. 2002. Mercury contents in liver and kidneys of wild boar (*Sus scrofa*) and red deer (*Cervus elaphus*). *Zeitschrift fur Jagdwissenschaft* 48: 156-160.
- Dobrzański, Z., R. Kolacz, S. Czaban, F. Bubel, M. Malczewski, R. Kupczyński, and S. Opalinski. 2017. Assessing Mercury Content in Plant and Animal Raw Materials in an Area Impacted by the Copper Industry. *Polish Journal of Environmental Studies* 26: 577-583. <https://doi.org/10.15244/pjoes/66709>
- Drevnick, P.E., A.P. Roberts, R.R. Otter, C.R. Hammerschmidt, R. Klaper, and J.T. Oris. 2008. Mercury toxicity in livers of northern pike (*Esox lucius*) from Isle Royale, USA. *Comparative Biochemistry and Physiology, Part C* 147: 331-338. <https://doi.org/10.1016/j.cbpc.2007.12.003>
- Durkalec, M., J. Szkoda, R. Kolacz, S. Opalinski, A. Nawrocka, and J. Zmudzki. 2015. Bioaccumulation of Lead, Cadmium and Mercury in Roe Deer and Wild Boars from Areas with Different Levels of Toxic Metal Pollution. *International Journal of Environmental Research* 9: 205-211. <https://doi.org/10.22059/IJER.2015.890>
- Dušek, L., Z. Svobodová, D. Janoušková, B. Vykusová, J. Jarkovský, R. Šmíd, and P. Pavliš. 2005. Bioaccumulation of mercury in muscle tissue of fish in the Elbe River (Czech Republic): multispecies monitoring study 1991–1996. *Ecotoxicology and Environmental Safety* 61: 256-267. <https://doi.org/10.1016/j.ecoenv.2004.11.007>
- EC. 2013. Directive 2013/39/EU of the European Parliament and of the Council of 12 August 2013 amending Directives 2000/60/EC and 2008/105/EC as regards priority substances in the field of water policy Text with EEA relevance. *OJ L* 226: 1-17. <http://data.europa.eu/eli/dir/2013/39/oj>
- Edwards, S.C., C.L. MacLeod, and J.N. Lester. 1999. Mercury Contamination of the Eel (*Anguilla anguilla*) and Roach (*Rutilus rutilus*) in East Anglia, UK. *Environmental Monitoring Assessment* 55: 371-387. <https://doi.org/10.1023/A:100593093>
- Egler, S.G., S. Rodrigues-Filho, R.C. Villas-Bôas, and C. Beinhoff. 2006. Evaluation of mercury pollution in cultivated and wild plants from two small communities of the Tapajós gold mining reserve, Pará State, Brazil. *Science of The Total Environment* 368: 424-433. <https://doi.org/10.1016/j.scitotenv.2005.09.037>
- Eklöf, K., J. Fölster, L. Sonesten, and K. Bishop. 2012. Spatial and temporal variation of THg concentrations in run-off water from 19 boreal catchments, 2000-2010. *Environmental Pollution* 164: 102-109. <https://doi.org/10.1016/j.envpol.2012.01.024>
- Elvince, R., T. Inoue, K. Tsushima, R. Takayanagi, U. Darung, S. Gumiri, S. Dohong, O. Nagafuchi, et al. 2008. Assessment of Mercury Contamination in the Kahayan River, Central Kalimantan, Indonesia. *Journal of Water and Environment Technology* 6: 103-112.
- Ertl, K., R. Kitzler, and W. Goessler. 2016. Elemental composition of game meat from Austria. *Food Additives and Contaminants, Part B* 9: 120-126. <https://doi.org/10.1080/19393210.2016.1151464>
- Falandysz, J. 1991. Manganese, Copper, Zinc, Iron, Cadmium, Mercury and Lead in Muscle Meat, Liver and Kidneys of Poultry, Rabbit and Sheep Slaughtered in the Northern Part of Poland, 1987. *Food Additives and Contaminants, Part B* 8: 71-83. <https://doi.org/10.1080/02652039109373957>
- Falandysz, J. 1993. Some toxic and essential trace metals in swine from Northern Poland. *Science of The Total Environment* 136: 193-204. [https://doi.org/10.1016/0048-9697\(93\)90307-R](https://doi.org/10.1016/0048-9697(93)90307-R)
- Falandysz, J. 1994. Some toxic and trace metals in big game hunted in the northern part of Poland in 1987–1991. *Science of the Total Environment* 141: 59-73. [https://doi.org/10.1016/0048-9697\(94\)90018-3](https://doi.org/10.1016/0048-9697(94)90018-3)
- Falandysz, J., M. Gučia, A. Frankowska, M. Kawano, and B. Skwarzec. 2001. Total mercury in wild mushrooms and underlying soil substrate from the city of Umeå and its surroundings, Sweden. *Bulletin of Environmental Contamination and Toxicology* 20: 247-253. <https://doi.org/10.1007/s001280188>
- Falandysz, J., A. Frankowska, and A. Mazur. 2007. Mercury and its bioconcentration factors in King Bolete (*Boletus edulis*) Bull. Fr. *Journal of Environmental Science and Health, Part A* 42: 2089-2095. <https://doi.org/10.1080/10934520701627058>
- Falandysz, J., J. Zhang, Y.Z. Wang, M. Saba, G. Krasieńska, A. Wiewak, and T. Li. 2015. Evaluation of Mercury Contamination in Fungi Boletus Species from Latosols, Lateritic Red Earths, and Red and Yellow Earths in the Circum-Pacific Mercuriferous Belt of Southwestern China. *PLoS ONE* 10: e0143608. <https://doi.org/10.1371/journal.pone.0143608>
- Falter R., and H.F. Schöler. 1994. Determination of methyl-, ethyl-, phenyl and total mercury in Neckar river fish. *Chemosphere* 29: 1333-1338. [https://doi.org/10.1016/0045-6535\(94\)90263-1](https://doi.org/10.1016/0045-6535(94)90263-1)
- Farkas, A., J. Salanki, and A. Specziar. 2003. Age- and size-specific patterns of heavy metals in the organs of freshwater fish *Abramis brama* L. populating a low-contaminated site. *Water Research* 37: 959-964. [https://doi.org/10.1016/S0043-1354\(02\)00447-5](https://doi.org/10.1016/S0043-1354(02)00447-5)
- Feng, X., G. Qiu, S. Wang, and L. Shang. 2003. Distribution and speciation of mercury in surface waters in mercury mining areas in Wanshan, Southwestern China. *Journal de Physique IV France* 107: 455-458. <https://doi.org/10.1051/jp4:20030339>



- Fleit, E., and G. Lakatos. 2003. Accumulative heavy metal patterns in the sediment and biotic compartments of the Tisza watershed. *Toxicology Letters* 140-141: 323-332. [https://doi.org/10.1016/s0378-4274\(03\)00029-8](https://doi.org/10.1016/s0378-4274(03)00029-8)
- Florijancic, T., S. Ozimec, D. Jelkic, N. Vuksic, N. Bilandzic, A. Gross Boskovic, and I. Boskovic. 2015. Assessment of heavy metal content in wild boar (*Sus scrofa* L.) hunted in eastern Croatia. *Journal of Environmental Protection and Ecology* 16: 630-636.
- Ganguli, P.Y., R.P. Mason, K.E. Abu-Saba, R.S. Anderson, and A.R. Flegal. 2000. Mercury Speciation in Drainage from the New Idria Mercury Mine, California. *Environmental Science and Technology* 34: 4773-4779. <https://doi.org/10.1021/es991364y>
- Gasparik, J., M. Dobias, M. Capcarova, P. Smehyl, J. Slamecka, J. Bujko, and J. Gasparik Jr. 2012. Concentration of cadmium, mercury, zinc, copper and cobalt in the tissues of wild boar (*Sus scrofa*) hunted in the western Slovakia. *Journal of Environmental Science and Health, Part A* 47: 1212-1216. <https://doi.org/10.1080/10934529.2012.672065>
- Gębka, K., M. Beldowska, D. Saniewska, K. Kuliński, and J. Beldowski. 2018. Watershed characteristics and climate factors effect on the temporal variability of mercury in the southern Baltic Sea rivers. *Journal of Environmental Sciences* 68: 55-64. <https://doi.org/10.1016/j.jes.2017.11.030>
- Gentès, S., R. Maury-Brachet, R. Guyneaud, M. Monperrus, J.M. André, S. Davail, and A. Legeay. 2013. Mercury bioaccumulation along food webs in temperate aquatic ecosystems colonized by aquatic macrophytes in south western France. *Ecotoxicology and Environmental Safety* 91: 180-187. <https://doi.org/10.1016/j.ecoenv.2013.02.001>
- Ghimpeteanu, O.M., K. Das, M. Melitaru, and M.L. Scippo. 2012. Assessment of Heavy Metals and Mineral Nutrients in Poultry Liver Using Inductively Coupled Plasma-mass Spectrometer (ICP-MS) and Direct Mercury Analyzer (DMA). *Bulletin of the University of Agricultural Sciences and Veterinary* 69: 353-359.
- Gizejewska, A., A. Spodniewska, and D. Barski. 2014. Concentration of lead, cadmium, and mercury in tissues of European beaver (*Castor fiber*) from the north-eastern Poland. *Bulletin of the Veterinary Institute in Pulawy* 58: 77-80. <https://doi.org/10.2478/bvip-2014-0012>
- Gnamuš, A., A.R. Byrne, and M. Horvat. 2000. Mercury in the Soil-Plant-Deer-Predator Food Chain of a Temperate Forest in Slovenia. *Environmental Science and Technology* 34: 3337-3345. <https://doi.org/10.1021/es991419w>
- Gomes Ribeiro, D.R., H. Faccin, T.R. Dal Molin, L.M. de Carvalho, and L.L. Amado. 2017. Metal and metalloid distribution in different environmental compartments of the middle Xingu River in the Amazon, Brazil. *Science of The Total Environment* 605-606: 66-74. <https://doi.org/10.1016/j.scitotenv.2017.06.143>
- Gray, J.E., P.M. Theodorakos, E.A. Bailey, and R.R. Turner. 2000. Distribution, speciation, and transport of mercury in stream-sediment, stream-water, and fish collected near abandoned mercury mines in southwestern Alaska, USA. *Science of The Total Environment* 260: 21-33. [https://doi.org/10.1016/S0048-9697\(00\)00539-8](https://doi.org/10.1016/S0048-9697(00)00539-8)
- Gulfer, H., F. Tataruch, and A.K. Ondersheka. 1997. Investigation of the lead, cadmium and mercury contents in the organs and muscles of roe deer and chamois in southern Tyrol. *Zeitschrift fur Jagdwissenschaft* 43: 240-250.
- Harmens, H., D.A. Norris, G.R. Koerber, A. Buse, E. Steinnes, and Å. Rühling. 2008. Temporal trends (1990-2000) in the concentration of cadmium, lead and mercury in mosses across Europe. *Environmental Pollution* 151: 368-376. <https://doi.org/10.1016/j.envpol.2007.06.043>
- Hashemi, M. 2018. Heavy metal concentrations in bovine tissues (muscle, liver and kidney) and their relationship with heavy metal contents in consumed feed. *Ecotoxicology and Environmental Safety* 154: 263-267. <https://doi.org/10.1016/j.ecoenv.2018.02.058>
- Hattula, M.L., J. Sarkka, J. Janatuinen, J. Paasivirta, and A. Roos. 1978. Total mercury and methyl mercury contents in fish from lake Päijänne. *Environmental Pollution* 17: 19-29. [https://doi.org/10.1016/0013-9327\(78\)90052-6](https://doi.org/10.1016/0013-9327(78)90052-6)
- HELCOM. 2015. Guidelines for the annual and periodical compilation and reporting of waterborne pollution inputs to the Baltic Sea (PLC-Water). Helsinki: Baltic Marine Environment Protection Commission.
- HELCOM. 2018. HELCOM metadata catalogue. Retrieved 23 September, 2020, from <http://metadata.helcom.fi/geonetwork/srv/eng/catalog.search#metadata/20be292d-e770-4242-8151-4fd4c35f461b>
- Heyes, A., C. Miller, and R.P. Mason. 2004. Mercury and methylmercury in Hudson River sediment: impact of tidal resuspension on partitioning and methylation. *Marine Chemistry* 90: 75-89. <https://doi.org/10.1016/j.marchem.2004.03.011>
- Horvat, M., N. Nolde, V. Fajon, V. Jereb, M. Logar, S. Lojen, R. Jacimovic, I. Falnoga, et al. 2003. Total mercury, methylmercury and selenium in mercury polluted areas in the province Guizhou, China. *Science of The Total Environment* 304: 231-256. [https://doi.org/10.1016/s0048-9697\(02\)00572-7](https://doi.org/10.1016/s0048-9697(02)00572-7)
- Jewett, S.C., X. Zhang, A. Sathy Naidu, J.J. Kelley, D. Dasher, and L.K. Duffy. 2003. Comparison of mercury and methylmercury in northern pike and Arctic grayling from western Alaska rivers. *Chemosphere* 50: 383-392. [https://doi.org/10.1016/S0045-6535\(02\)00421-6](https://doi.org/10.1016/S0045-6535(02)00421-6)
- Jorhem, L., S. Slorach, B. Sundström, and B. Ohlin. 1991. Lead, cadmium, arsenic and mercury in meat, liver and kidney of Swedish pigs and cattle in 1984-88. *Food Additives and Contaminants* 8: 201-211. <https://doi.org/10.1080/02652039109373970>
- Kalisińska, E., H. Budis, N. Lanocha, J. Podlasinska, E. Jedrzejewska, and D.I. Kosik-Bogacka. 2012a. Comparison of Hepatic and Nephric Total Mercury Concentrations Between Feral and Ranch American Mink (*Neovison vison*) from Northwestern Poland. *Bulletin of Environmental Contamination and Toxicology* 88: 802-806. <https://doi.org/10.1007/s00128-012-0555-5>
- Kalisińska, E., P. Lisowski, and D.I. Kosik-Bogacka. 2012b. Red fox *Vulpes vulpes* (L., 1758) as a bioindicator of mercury contamination in terrestrial ecosystems of north-western Poland. *Biological Trace Element Research* 145: 172-180. <https://doi.org/10.1007/s12011-011-9181-z>
- Kalisińska, E., N. Lanocha-Arendarczyk, D.I. Kosik-Bogacka, H. Budis, B. Pilarczyk, A. Tomza-Marciniak, J. Podlasinska, L. Cieslik, et al. 2017. Muscle mercury and selenium in fishes and semiaquatic



- mammals from a selenium-deficient area. *Ecotoxicology and Environmental Safety* 136: 24-30. <https://doi.org/10.1016/j.ecoenv.2016.10.028>
- Kambamanoli-Dimou, A., S. Kilikidis, and A. Kamarianos. 1989. Methylmercury concentrations in broiler's meat and hen's meat and eggs. *Bulletin of Environmental Contamination and Toxicology* 42: 728-734.
- Kavčič, A., K. Mikuš, M. Debeljak, J.T. van Elteren, I. Arčon, A. Kodre, P. Kump, A.G. Karydas, et al. 2019. Localization, ligand environment, bioavailability and toxicity of mercury in *Boletus* spp. and *Scutigera pes-caprae* mushrooms. *Ecotoxicology and Environmental Safety* 184: 109623. <https://doi.org/10.1016/j.ecoenv.2019.109623>
- Kensova, R., O. Celechovska, J. Doubravova, and Z. Svobodova. 2010. Concentrations of metals in tissues of fish from the Vestonice reservoir. *Acta Veterinaria Brno* 79: 335-345.
- Khabarova, L.S., E.S. Ivanova, N.Y. Poddubnaya, A.V. Andreeva. A.P. Selezneva, and D.M. Feneva. 2018. Mercury in Tissues of Red Fox as Indicator of Environmental Pollution. *Advances in Engineering Research* 177: 96-100. <https://doi.org/10.2991/isees-18.2018.19>
- Khallafalla, F.A., F.H. Ali, F. Schwagele, and M.A. Abd-El-Wahab. 2011. Heavy metal residues in beef carcasses in Beni-Suef abattoir, Egypt. *Veterinaria Italiana* 47: 351-361.
- Kłos, A., M. Rajfur, I. Šrámek, and M. Waclawek. 2012. Mercury concentration in lichen, moss and soil samples collected from the forest areas of Praded and Glacensis Euroregions (Poland and Czech Republic). *Environmental Monitoring and Assessment* 184: 6765-6774. <https://doi.org/10.1007/s10661-011-2456-1>
- KOBIZE. 2019. *Poland's Informative Inventory Report*. Warsaw: Institute of Environmental Protection – National Research Institute.
- Komov, V.T., E.S. Ivanova, V.A. Gremyachikh, and N.Y. Poddubnaya. 2016. Mercury Content in Organs and Tissues of Indigenous (*Vulpes vulpes* L.) and Invasive (*Nyctereutes procyonoides* Gray.) Species of Canids from Areas Near Cherepovets (North-Western Industrial Region, Russia). *Bulletin of Environmental Contamination and Toxicology* 97: 480-485. <https://doi.org/10.1007/s00128-016-1891-7>
- Koval, P.V., G.V. Kalmychkov, V.F. Gelety, G.A. Leonova, V.I. Medvedev, and L.D. Andrulaitis. 1999. Correlation of natural and technogenic mercury sources in the Baikal polygon, Russia. *Journal of Geochemical Exploration* 66: 277-289. [https://doi.org/10.1016/S0375-6742\(99\)00041-2](https://doi.org/10.1016/S0375-6742(99)00041-2)
- Lavigne, M., M. Lucotte, and S. Paquet. 2010. Relationship between Mercury Concentration and Growth Rates for Walleyes, Northern Pike, and Lake Trout from Quebec Lakes. *North American Journal of Fisheries Management* 30: 1221-1237. <http://dx.doi.org/10.1577/M08-065.1>
- Lawson, N.M., R.P. Mason, and J.M. Laprote. 2001. The fate and transport of mercury, methylmercury, and other trace metals in Chesapeake Bay tributaries. *Water Research* 35: 501-515. [https://doi.org/10.1016/S0043-1354\(00\)00267-0](https://doi.org/10.1016/S0043-1354(00)00267-0)
- Lazarus, M., T. Orct, M. Blanuša, I. Vicković, and B. Šoštarić. 2008. Toxic and essential metal concentrations in four tissues of red deer (*Cervus elaphus*) from Baranja, Croatia. *Food Additives and Contaminants, Part A* 25: 270-283. <https://doi.org/10.1080/02652030701364923>
- Lazarus, M., A.P. Crnić, N. Bilandžić, J. Kusak, and S. Reljić. 2014. Cadmium, lead, and mercury exposure assessment among Croatian consumers of free-living game. *Archives of Industrial Hygiene and Toxicology* 65: 281-291. <https://doi.org/10.2478/10004-1254-65-2014-2527>
- Lehel, J., P. Laczay, A. Gyurcsó, F. Jánoska, S. Majoros, K. Lányi, and M. Marosán. 2015. Toxic heavy metals in the muscle of roe deer (*Capreolus capreolus*) – food toxicological significance. *Environmental Science and Pollution Research* 23: 4465-4472. <https://doi.org/10.1007/s11356-015-5658-1>
- Lepom, P., and J. Wellmitz. 2017. Mercury Monitoring in Fish under the WFD – A German Perspective. International Conference on Chemistry and the Environment, Oslo, 18-22 June 2017 (oral presentation).
- Lindeström, L. 2001. Mercury in Sediment and Fish Communities of Lake Vänern, Sweden: Recovery from Contamination. *Ambio* 30: 538-544. <https://doi.org/10.1579/0044-7447-30.8.538>
- Lino, A.S., D. Kasper, Y.S. Giuda, J.R. Thomaz, and O. Malm. 2019. Total and methyl mercury distribution in water, sediment, plankton and fish along the Tapajós River basin in the Brazilian Amazon. *Chemosphere* 235: 690-700. <https://doi.org/10.1016/j.chemosphere.2019.06.212>
- Liu, J., X. Feng, W. Zhu, X. Zhang, and R. Yin. 2011. Spatial distribution and speciation of mercury and methyl mercury in the surface water of East River (Dongjiang) tributary of Pearl River Delta, South China. *Environmental Science and Pollution Research* 19: 105-112. <https://doi.org/10.1007/s11356-011-0542-0>
- López-Alonso, M., M. Miranda, C. Castillo, J. Hernández, M. García-Vaquero, and J.L. Bedito. 2007. Toxic and essential metals in liver, kidney and muscle of pigs at slaughter in Galicia, north-west Spain. *Food Additives and Contaminants* 24: 943-954. <https://doi.org/10.1080/02652030701216719>
- Łuczynska, J., M.J. Łuczynski, B. Paszczyk, and E. Tońska. 2016. Concentration of mercury in muscles of predatory and non-predatory fish from lake Pluszne (Poland). *Journal of Veterinary Research* 60: 43-47. <https://doi.org/10.1515/jvetres-2016-0007>
- Łuczynska, J., B. Paszczyk, and M.J. Łuczynski. 2018. Fish as a bioindicator of heavy metals pollution in aquatic ecosystem of Pluszne Lake, Poland, and risk assessment for consumer's health. *Ecotoxicology and Environmental Safety* 153: 60-67. <https://doi.org/10.1016/j.ecoenv.2018.01.057>
- Lukáčová, A., Ł. Binkowski, and J. Golian. 2014. Mercury concentration in meat products. *Maso International* 1: 43-47.
- Mão de Ferro, A., A.M. Mota, and J. Canário. 2014. Pathways and speciation of mercury in the environmental compartments of Deception Island, Antarctica. *Chemosphere* 95: 227-233. <https://doi.org/10.1016/j.chemosphere.2013.08.081>
- Mariam, I., S. Iqbal, and S.A. Nagra. 2004. Distribution of Some Trace and Macrominerals in Beef, Mutton and Poultry. *International Journal of Agriculture and Biology* 6: 816-820.
- Marsálek, P., Z. Svobodová, T. Randák, and J. Švehla. 2005. Mercury and Methylmercury Contamination of Fish from the Skalka Reservoir: A Case Study. *Acta Veterinaria Brno* 74: 427-434. <https://doi.org/10.2754/avb200574030427>

- Maurice-Bourgoin, L., I. Quiroga, J.L. Guyot, and O. Malm. 1999. Mercury Pollution in the Upper Beni River, Amazonian Basin: Bolivia. *Ambio* 28: 302-306. <https://www.jstor.org/stable/4314900>
- Mazej, Z., S. Al Sayegh-Petkovšek, and B. Pokorny. 2010. Heavy metal concentrations in food chain of lake Velenjsko Jezero, Slovenia: an artificial lake from mining. *Archives of Environmental Contamination and Toxicology* 58: 998-1007. <https://doi.org/10.1007/s00244-009-9417-5>
- Mazurkiewicz, N., and J. Podlasińska. 2014. The mercury content of macrofungi from area of west Pomeranian district. *Bromatologia i Chemia Toksykologiczna* 47: 114-119.
- Mazzoni, M., M. Petracci, A. Meluzzi, C. Cavani, P. Clavenzani, and F. Sirri. 2015. Relationship between pectoralis major muscle histology and quality traits of chicken meat. *Poultry Science* 94: 123-130. <https://doi.org/10.3382/ps/peu043>
- Meinelt, T., R. Krüger, M. Pietrock, R. Osten, and C. Steinberg. 1997. Mercury pollution and macrophage centres in pike (*Esox lucius*) tissues. *Environmental Science and Pollution Research* 4: 32-36. <https://doi.org/10.1007/bf02986262>
- Melgar, M.J., J. Alonso, and M.A. Garcia. 2009. Mercury in edible mushrooms and underlying soil: Bioconcentration factors and toxicological risk. *Science of The Total Environment* 407: 5328-5334. <https://doi.org/10.1016/j.scitotenv.2009.07.001>
- Migaszewski, Z.M., A. Gałuszka, S. Dołęgowska, J.G. Crock, and P.J. Lamothe. 2010. Mercury in mosses *Hylocomium splendens* (Hedw.) B.S.G. and *Pleurozium schreberi* (Brid.) Mitt. from Poland and Alaska: Understanding the origin of pollution sources. *Ecotoxicology and Environmental Safety* 73: 1345-1351. <https://doi.org/10.1016/j.ecoenv.2010.06.015>
- Millán, J., R. Mateo, M.A. Taggart, J.V. Lopez-Bao, M. Viota, L. Monsalve, P.R. Camarero, E. Blazquez, et al. 2008. Levels of heavy metals and metalloids in critically endangered Iberian lynx and other wild carnivores from Southern Spain. *Science of The Total Environment* 399: 193-201. <https://doi.org/10.1016/j.scitotenv.2008.03.038>
- Molina, J.A., R. Oyarzun, J.M. Esbri, and P. Higuera. 2006. Mercury accumulation in soils and plants in the Almaden mining district, Spain: one of the most contaminated sites on Earth. *Environmental Geochemistry and Health* 28: 487-498. <https://doi.org/10.1007/s10653-006-9058-9>
- Musilová, J., P. Trebichalský, I. Jančo, T. Tóth, and M. Šnirc. 2019. Mercury bioaccumulation in *Boletus edulis* bull. In different forest ecosystems in Slovakia. *GeoConference SGEM* 19: 753-760. <https://doi.org/10.5593/sgem2019/3.2>
- Naik, A.P., and C.R. Hammerschmidt. 2011. Mercury and trace metal partitioning and fluxes in suburban Southwest Ohio watersheds. *Water Research* 45: 5151-5160. <https://doi.org/10.1016/j.watres.2011.07.023>
- Nawrocka, A., M. Durkalec, J. Szkoda, A. Filipek, M. Kmiecik, J. Żmudzki, and A. Posyniak. 2020. Total mercury levels in the muscle and liver of livestock and game animals in Poland, 2009–2018. *Chemosphere* 258: 127311. <https://doi.org/10.1016/j.chemosphere.2020.127311>
- Nguetseng, R., A. Fliedner, B. Knopf, B. Lebreton, M. Quack, and H. Rüdell. 2015. Retrospective monitoring of mercury in fish from selected European freshwater and estuary sites. *Chemosphere* 134: 427-434. <https://doi.org/10.1016/j.chemosphere.2015.04.094>
- Niemi, A., E.R. Venäläinen, T. Hirvi, J. Hirn, and E. Karppanen. 1991. The lead, cadmium and mercury concentrations in muscle, liver and kidney from Finnish pigs and cattle during 1987-1988. *Zeitschrift für Jagdwissenschaft* 192: 427-429. <https://doi.org/10.1007/BF01193141>
- Nkansah, M.A., and J.K. Ansah. 2014. Determination of Cd, Hg, As, Cr and Pb levels in meat from the Kumasi Central Abattoir. *International Journal of Scientific and Research Publications* 4: 61-64.
- Noël, L., R. Chekri, S. Millour, M. Merlo, J.C. Leblanc, and T. Guérin. 2013. Distribution and relationships of As, Cd, Pb and Hg in freshwater fish from five French fishing areas. *Chemosphere* 90: 1900-1910. <https://doi.org/10.1016/j.chemosphere.2012.10.015>
- Nogueira, N., N. Cordeiro, and M.J. Aveiro. 2013. Chemical composition, fatty acids profile and cholesterol content of commercialized marine fishes captured in Northeastern Atlantic. *Journal of Fisheries Science* 7: 271-286. <https://doi.org/10.3153/jfsc.2013029>
- Olson, C.L., M. Jiskra, J.E. Sonke, and D. Obrist. 2019. Mercury in tundra vegetation of Alaska: Spatial and temporal dynamics and stable isotope patterns. *Science of The Total Environment* 660: 1502-1512. <https://doi.org/10.1016/j.scitotenv.2019.01.058>
- Olsson, I.M., S. Jonsson, and A. Oskarsson. 2001. Cadmium and zinc in kidney, liver, muscle and mammary tissue from dairy cows in conventional and organic farming. *Journal of Environmental Monitoring* 3: 531-538. <https://doi.org/10.1039/b104506g>
- Opaliński, S., Z. Dobrzański, P. Pokorny, and R. Barej. 2004. The research of concentration of mercury in tissues of laying hens housing in free range system in agricultural and industrial regions. *Zeszyty Naukowe Akademii Rolniczej we Wrocławiu* 501: 221-229.
- Ovsepian, A.E., Y.A. Fedorov, A.A. Zimovets, and V.A. Savitsky. 2016. Diurnal dynamics of mercury in water objects of the north European part of Russia. Diurnal dynamics of mercury in water objects of the north European part of Russia. *GeoConference SGEM* 1: 243-250.
- Packer, B.N., G.T. Carling, T.J. Veverica, K.A. Russell, S.T. Nelson, Z.T. Aanderud. 2020. Mercury and dissolved organic matter dynamics during snowmelt runoff in a montane watershed, Provo River, Utah, USA. *Science of The Total Environment* 704: 135297. <https://doi.org/10.1016/j.scitotenv.2019.135297>
- Parinet, J., E. Royer, M. Saint-Hilaire, C. Chafey, L. Noël, B. Minville, G. Dervilly-Pinel, E. Engel, et al. 2018. Classification of trace elements in tissues from organic and conventional French pig production. *Meat Science* 141: 28-35. <https://doi.org/10.1016/j.meatsci.2018.02.008>
- Pasieczna, A. 2012. *Polish geochemical atlas*. Warsaw: Geological Publishing House.
- Petrović, Z. 2007. Investigation of cadmium, mercury and arsenic accumulation in wild boar tissues from hunting areas in Serbia. *Biotechnology in Animal Husbandry* 23: 83-88. <https://doi.org/10.2298/BAH0704083P>
- Pirrone, N., G.J. Keeler, and J.O. Nriagu. 1996. Regional differences in worldwide emissions of mercury to the atmosphere. *Atmospheric Environment* 30: 2981-2987. [https://doi.org/10.1016/1352-2310\(95\)00498-x](https://doi.org/10.1016/1352-2310(95)00498-x)

- Piskorova, L., Z. Vasilkova, and I. Krupicer. 2003. Heavy metals residues in tissues of wild boar (*Sus scrofa*) and red fox (*Vulpes vulpes*) in the Central Zemplin region of the Slovak Republic. *Czech Journal of Animal Science* 48: 134-138.
- Polak-Juszczak, L., and T. Nemer. 2016. Methylmercury and Total Mercury in Eels, *Anguilla anguilla*, from Lakes in Northeastern Poland: Health Risk Assessment. *EcoHealth* 13: 582-590. <https://doi.org/10.1007/s10393-016-1139-3>
- Qiu, G., X. Feng, S. Wang, and L. Shang. 2005. Mercury and methylmercury in riparian soil, sediments, mine-waste calcines, and moss from abandoned Hg mines in east Guizhou province, southwestern China. *Applied Geochemistry* 20: 627-638. <https://doi.org/10.1016/j.apgeochem.2004.09.006>
- Rempel, K. 2010. *What Is the Level of Mercury in Plants That Form the Diet of the Porcupine Caribou?* Ottawa: The Royal Canadian Geographical Society.
- Rencz, A.N., N.J. O'Driscoll, G.E.M. Hall, T. Peron, K. Telmer, and N.M. Burgess. 2003. Spatial variation and correlations of mercury levels in the terrestrial and aquatic components of a Wetland dominated ecosystem: Kejimikujik Park, Nova Scotia, Canada. *Water, Air, and Soil Pollution* 143: 271-288. <https://doi.org/10.1023/A:1022899919151>
- Riget, F., G. Asmund, and P. Aastrup. 2000. The use of lichen (*Cetraria nivalis*) and moss (*Rhacomitrium lanuginosum*) as monitors for atmospheric deposition in Greenland. *Science of The Total Environment* 245: 137-148. [https://doi.org/10.1016/s0048-9697\(99\)00439-8](https://doi.org/10.1016/s0048-9697(99)00439-8)
- Rudy, M. 2009. The analysis of correlations between the age and the level of bioaccumulation of heavy metals in tissues and the chemical composition of sheep meat from the region in SE Poland. *Food and Chemical Toxicology* 47: 1117-1122. <https://doi.org/10.1016/j.fct.2009.01.035>
- Saniewska, D. 2013. Input pathways of mercury to the coastal zone of the Gulf of Gdansk. PhD Thesis. Gdynia, Poland: University of Gdańsk.
- Saniewska, D., M. Beldowska, J. Beldowski, A. Jędruch, M. Saniewski, and L. Falkowska. 2014a. Mercury loads into the sea associated with extreme flood. *Environmental Pollution* 191: 93-100. <https://doi.org/10.1016/j.envpol.2014.04.003>
- Saniewska, D., M. Beldowska, J. Beldowski, M. Saniewski, M. Szubska, A. Romanowski, and L. Falkowska. 2014b. The impact of land use and season on the riverine transport of mercury into the marine coastal zone. *Environmental Monitoring and Assessment* 186: 7593-7604. <https://doi.org/10.1007/s10661-014-3950-z>
- Scharenberg, W., P. Gramann, and W.H. Pfeiffer. 1994. Bioaccumulation of heavy metals and organochlorines in a lake ecosystem with special reference to bream (*Abramis brama* L.). *Science of The Total Environment* 155: 187-197. [https://doi.org/10.1016/0048-9697\(94\)90291-7](https://doi.org/10.1016/0048-9697(94)90291-7)
- Schuster, P.F., R.G. Striegl, G.R. Aiken, D.P. Krabbenhof, J.F. Dewild, K. Butler, B. Kamark, and M. Dornblaser. 2011. Mercury Export from the Yukon River Basin and Potential Response to a Changing Climate. *Environmental Science and Technology* 45: 9262-9267. <https://doi.org/10.1021/es202068b>
- Shah, A.Q., T.G. Kazi, J.A. Baig, H.I. Afridi, G.A. Kandhro, M.B. Arain, N.F. Kolachi, and S.K. Wadhwa. 2010. Total mercury determination in different tissues of broiler chicken by using cloud point extraction and cold vapor atomic absorption spectrometry. *Food and Chemical Toxicology* 48: 65-69. <https://doi.org/10.1016/j.fct.2009.09.016>
- Shao, J., C. Liu, Q. Zhang, J. Fu, R. Yang, J. Shi, Y. Cai, and G. Jiang. 2017. Characterization and speciation of mercury in mosses and lichens from the high-altitude Tibetan Plateau. *Environmental Geochemistry and Health* 39: 475. <https://doi.org/10.1007/s10653-016-9828-y>
- Sheffy, T.B., and J.R.S. Amant. 1982. Mercury burdens in furbearers in Wisconsin. *Journal of Wildlife Management* 46: 1117-1120. <https://doi.org/10.2307/3808255>
- Širić, I., P. Žurha, D. Barkić, and M.M. Staver. 2015. Trace Element Contents in the Edible Mushroom *Boletus edulis* Bull. ex Fries. *Agriculturae Conspectus Scientificus* 80: 223-227.
- Sobańska, M.A. 2005. Wild boar hair (*Sus scrofa*) as a non-invasive indicator of mercury pollution. *Science of The Total Environment* 339: 81-88. <https://doi.org/10.1016/j.scitotenv.2004.07.018>
- Sonesten, S. 2001. Mercury content in roach (*Rutilus rutilus* L.) in circumneutral lakes – effects of catchment area and water chemistry. *Environmental Pollution* 112: 471-481. [https://doi.org/10.1016/S0269-7491\(00\)00135-4](https://doi.org/10.1016/S0269-7491(00)00135-4)
- Srebočan, E., A. Prevendar Crnić, A.M. Ekert-Kabalin, M. Lazarus, J. Jurasović, K. Tomljanović, D. Andreić, I. Strunjak Perović, et al. 2011. Cadmium, lead, and mercury concentrations in tissues of roe deer (*Capreolus capreolus* L.) and wild boar (*Sus scrofa* L.) from lowland Croatia. *Czech Journal of Food Sciences* 29: 624-633.
- Suchara, I., J. Sucharova, M. Hola, C. Reimann, R. Boyd, P. Filzmoser, and P. Englmaier. 2011. The performance of moss, grass, and 1- and 2-year old spruce needles as bioindicators of contamination: A comparative study at the scale of the Czech Republic. *Science of The Total Environment* 409: 2281-2297. <https://doi.org/10.1016/j.scitotenv.2011.02.003>
- Sun, X., Q. Zhang, M. Li, K. Kandel, B. Rawat, A. Pandey, J. Guo, S. Kang, et al. 2020. Mercury variation and export in trans-Himalayan rivers: Insights from field observations in the Koshi River. *Science of The Total Environment* 738: 139836. <https://doi.org/10.1016/j.scitotenv.2020.139836>
- Surtipanti, S., S. Suwirma, S. Yumiarti, and Y. Mellawati. 1995. Determination of heavy metals in meat, intestine, liver, eggs, and chicken using neutron activation analysis and atomic absorption spectrometry. *Atom Indonesia* 21: 1-8.
- Szkoda, J., and J. Żmudzki. 2001. Toxic elements in tissues of game animals. *Medycyna Weterynaryjna* 57: 883-886.
- Szkoda, J., J. Żmudzki, A. Nawrocka, and M. Kmiecik. 2014. Toxic elements in free-living freshwater fish, water and sediments in Poland. *Bulletin of the Veterinary Institute in Pulawy* 58: 589-595. <https://doi.org/10.2478/bvip-2014-0091>
- Terán-Mita, T.A., A. Faz, F. Salvador, J.M. Arocena, and J.A. Acosta. 2013. High altitude artisanal small-scale gold mines are hot spots for Mercury in soils and plants. *Environmental Pollution* 173: 103-109. <https://doi.org/10.1016/j.envpol.2012.10.008>
- Vos, G., J.J.M.H. Teeuwen, and W. van Delft. 1986. Arsen, Cadmium, Blei und Quecksilber in Fleisch, Leber und Niere von Mastschweinen

- in den Niederlanden während der Jahre 1980-1985. *Zeitschrift für Lebensmittel-Untersuchung und Forschung* 183: 397-401. <https://doi.org/10.1007/BF01140547>
- Vos, G., J.P.C. Hovens, and W. van Delft. 1987. Arsenic, cadmium, lead and mercury in meat, livers and kidneys of cattle slaughtered in the Netherlands during 1980-1985. *Food Additives and Contaminants* 4: 73-88. <https://doi.org/10.1080/02652038709373617>
- Wang, S., Y. Jia, S. Wang, X. Wang, H. Wang, Z. Zhao, and B. Liu. 2009. Total mercury and monomethylmercury in water, sediments, and hydrophytes from the rivers, estuary, and bay along the Bohai Sea coast, northeastern China. *Applied Geochemistry* 24: 1702-1711. <https://doi.org/10.1016/j.apgeochem.2009.04.037>
- Wang, X., W. Yuan, X. Feng, D. Wang, and J. Luo. 2019. Moss facilitating mercury, lead and cadmium enhanced accumulation in organic soils over glacial erratic at Mt. Gongga, China. *Environmental Pollution* 254: 112974. <https://doi.org/10.1016/j.envpol.2019.112974>
- Wu, J.J. 2014. Evaluation of Mercury Concentration in Yangtze River Estuary. *Journal of Anhui Agricultural Sciences* 19: 6339-6340.
- Wyrzykowska, B., J. Falandysz, and G. Jarzyńska. 2012. Metals in edible fish from Vistula River and Dead Vistula River channel, Baltic Sea. *Journal of Environmental Science and Health, Part B* 47: 296-305. <https://doi.org/10.1080/03601234.2012.638890>
- Xiao, Z., J. Sommar, O. Lindqvist, and E. Giouleka. 1998. Atmospheric mercury deposition to grass in southern Sweden. *Science of The Total Environment* 213: 85-94. [https://doi.org/10.1016/s0048-9697\(98\)00080-1](https://doi.org/10.1016/s0048-9697(98)00080-1)
- Yamaguchi, N., D. Gazzard, G. Scholey, and D.W. Macdonald. 2003. Concentrations and hazard assessment of PCBs, organochlorine pesticides and mercury in fish species from the upper Thames: River pollution and its potential effects on top predators. *Chemosphere* 50: 265-273. [https://doi.org/10.1016/S0045-6535\(02\)00482-4](https://doi.org/10.1016/S0045-6535(02)00482-4)
- Zamani-Ahmadmohammadi, R., A.R. Bakhtiari, and J.A. Rodríguez Martín. 2014. Spatial relations of mercury contents in Pike (*Esox lucius*) and sediments concentration of the Anzali wetland, along the southern shores of the Caspian Sea, Iran. *Marine Pollution Bulletin* 84: 97-103. <https://doi.org/10.1016/j.marpolbul.2014.05.030>
- Żarski, T.P., B. Debski, E. Rokicki, M. Samek, J. Valka, and I. Beseda. 1995a. Free living animals as bioindicators of mercury pollution. *Ekologia Bratislava* 14: 113-117.
- Żarski, T.P., B. Debski, and M. Samek. 1995b. Relation between selenium and mercury concentrations in tissues of hares (*Lepus europaeus* Pall.) from regions with various environmental contaminations. *Ekologia Bratislava* 14: 93-97.
- Zhang, D., A. Frankowska, G. Jarzyńska, A.K. Kojta, M. Drewnowska, D. Wydmańska, L. Bielawski, J. Wang, et al. 2010. Metals of King Bolete (*Boletus edulis*) Bull.: Fr. collected at the same site over two years. *African Journal of Agricultural Research* 5: 3050-3055.
- Zięba, M. 2003. Concentrations of heavy metals in tissues of sheep from south-eastern Poland. *Przegląd Hodowlany* 6: 21-24.
- Zolfaghari, G. 2018. Risk assessment of mercury and lead in fish species from Iranian international wetlands. *MethodsX* 5: 438-447. <https://doi.org/10.1016/j.mex.2018.05.002>
